# Supplementary material
Source: MDPI journal article supplement (https://www.mdpi.com/2073-4441/10/1/59)
Supplement: s1 [file s1]

## Sheet: consolidated
sn	uid	region	group	female	local	undergrad	religion	major	localstay	localedu	Country	drink_bot	freq_bot	price	safhyg	convavail	taste	habit	religious	envir	prefer_self	prefer_peer	prefer_fami	tap_unsafe	bot_safer	tap_regu	taste_same	tap_contamin	bottle_chem	bottle_hardclean	bottle_inconve	filtap_access	gov_trust	bot_envharm	lessbot_env	bottle_envcontrib	bottle_guilty	recy_bot_notenough	fo_others_recy	enc_peer_lessbot	dormstay	dm_tap	dm_bot	dm_boil	dm_filt		Do you live on campus (eg. Dorm)?	41.1:How often do you drink tap water?	41.2:How often do you drink bottled water?
1	h1	Hong Kong	2	0	1	1	A	G	1	1	A	0	2	5	3	4	3	1	1	2	B	B	C	4	5	2	4	5	4	4	2	3	2	4	5	4	3	3	2	1	1	1	2	2	5		A.Yes	A.Never	B.Occasionally
2	h2	Hong Kong	2	0	1	1	A	G	1	1	A	1	2	4	2	5	3	2	1	4	F	H	C	2	4	2	3	1	4	2	2	3	3	5	3	4	3	3	2	3	1	3	1	2	3		A.Yes	C.Sometimes	A.Never
3	h3	Hong Kong	2	0	1	1	A	D	1	1	A	0	5	4	5	4	3	4	3	5	F	F	F	5	5	5	4	5	3	2	2	4	3	5	5	5	5	5	5	5	1	1	4	1	4		A.Yes	A.Never	D.Frequently
4	h4	Hong Kong	2	0	1	1	A	C	1	1	A	0	1	5	3	4	3	4	2	4	H	H	C	4	3	2	2	2	3	2	2	5	4	4	4	3	4	5	5	4	1	5	2	4	3		A.Yes	E.Always	B.Occasionally
5	h5	Hong Kong	2	1	1	1	A	G	1	1	A	0	2	3	5	4	4	3	1	2	D	B	C	4	5	2	3	4	3	2	1	2	3	4	4	4	3	4	2	3	1	5	2	1	5		A.Yes	E.Always	B.Occasionally
6	h6	Hong Kong	2	0	1	0	A	C	1	1	A	0	2	4	5	2	1	1	1	4	F	E	F	4	5	2	1	4	2	2	2	4	4	5	4	4	4	2	4	4	1	3	3	3	3		A.Yes	C.Sometimes	C.Sometimes
7	h7	Hong Kong	2	0	1	1	A	D	1	1	A	0	1	3	4	4	4	3	3	3	D	D	D	5	3	4	4	3	3	3	2	3	3	3	3	2	4	4	4	4	1	4	3	3	3		A.Yes	D.Frequently	C.Sometimes
8	h8	Hong Kong	2	0	1	1	A	B	0	0	A	0	4	5	3	5	1	1	1	4	D	H	D	3	2	2	5	5	5	3	5	1	2	3	5	4	3	3	1	2	1	4	4	1	4		A.Yes	D.Frequently	D.Frequently
9	h9	Hong Kong	2	0	1	1	A	B	1	1	A	0	1	4	5	3	3	3	3	4	D	H	C	2	5	2	2	4	3	3	2	4	2	4	3	2	1	3	2	2	1	1	2	1	5		A.Yes	A.Never	B.Occasionally
10	h10	Hong Kong	2	0	1	1	A	G	1	1	A	1	5	1	5	4	3	4	3	5	F	C	C	4	5	2	3	3	3	3	3	3	3	3	3	4	3	4	4	4	1	4	2	2	2		A.Yes	D.Frequently	B.Occasionally
11	h11	Hong Kong	2	0	1	1	A	C	1	1	A	0	1	5	3	4	2	2	2	3	B	H	D	4	4	3	3	4	4	2	4	3	3	4	4	4	2	5	5	4	1	1	2	2	4		A.Yes	A.Never	B.Occasionally
12	h12	Hong Kong	2	0	1	1	A	B	1	1	A	0	4	2	4	4	2	4	2	4	F	A	A	4	4	4	4	4	4	4	4	4	4	4	4	4	4	4	4	4	1	3	3	3	3		A.Yes	C.Sometimes	C.Sometimes
13	h13	Hong Kong	2	0	1	1	C	C	1	1	A	0	2	3	5	4	5	3	3	3	D	C	D	3	5	2	2	5	4	3	3	4	3	4	3	4	2	3	2	3	1	4	2	3	4		A.Yes	D.Frequently	B.Occasionally
14	h14	Hong Kong	2	0	1	1	A	C	1	1	A	0	2	5	5	5	5	3	5	5	A	A	A	5	5	5	5	5	5	5	5	5	5	5	5	5	5	5	5	5	1	4	4	4	4		A.Yes	D.Frequently	D.Frequently
15	h15	Hong Kong	2	0	1	1	A	B	1	1	A	0	2	5	5	5	2	2	1	5	B	B	D	2	2	3	4	2	4	4	3	4	3	5	5	5	4	2	4	5	1	4	1	1	4		A.Yes	D.Frequently	A.Never
16	h16	Hong Kong	2	0	0	1	A	C	1	1	E	1	4	4	5	5	5	3	1	3	E	E	C	4	4	3	4	4	2	2	2	3	3	3	3	3	3	3	3	2	1	3	3	2	3		A.Yes	C.Sometimes	C.Sometimes
17	h17	Hong Kong	2	1	1	1	A	B	1	1	A	0	1	4	5	3	4	4	1	4	D	E	D	3	5	3	3	4	3	4	3	3	3	5	5	4	4	3	4	4	0	1	3	1	5		B.No	A.Never	C.Sometimes
18	h18	Hong Kong	2	0	0	1	A	D	0	0	D	1	5	4	5	5	3	4	5	5	E	E	E	3	5	3	3	5	5	3	5	4	4	5	4	4	3	5	5	5	1	4	2	1	3		A.Yes	D.Frequently	B.Occasionally
19	h19	Hong Kong	2	1	1	1	A	D	1	1	A	0	3	2	2	4	4	2	1	2	B	H	H	3	3	3	2	4	2	3	2	3	3	4	4	4	5	3	2	4	1	4	3	3	4		A.Yes	D.Frequently	C.Sometimes
20	h20	Hong Kong	2	1	1	1	A	F	1	1	A	0	1	5	5	5	4	2	1	4	D	D	D	3	4	3	3	5	5	2	2	4	4	5	4	4	4	3	4	3	1	1	1	3	5		A.Yes	A.Never	A.Never
21	h21	Hong Kong	2	0	1	1	A	D	1	1	A	0	3	4	4	3	4	4	3	2	E	E	C	2	4	2	4	4	2	2	3	4	4	3	3	3	3	3	3	4	1	4	2	2	4		A.Yes	D.Frequently	B.Occasionally
22	h22	Hong Kong	2	0	1	1	C	B	1	1	A	0	3	4	5	5	4	4	3	4	D	H	D	4	5	2	3	5	4	3	4	4	4	4	4	4	4	4	4	3	1	3	3	3	3		A.Yes	C.Sometimes	C.Sometimes
23	h23	Hong Kong	2	0	1	0	A	G	1	1	A	1	5	3	2	3	2	3	1	2	C	C	C	2	2	3	3	3	2	2	2	2	2	4	3	2	2	2	3	2	1	2	2	2	2		A.Yes	B.Occasionally	B.Occasionally
24	h24	Hong Kong	2	0	1	1	A	B	1	1	A	0	3	5	5	4	5	2	1	3	F	H	F	4	5	2	2	4	1	4	5	3	2	3	4	4	5	5	2	3	1	2	2	5	5		A.Yes	B.Occasionally	B.Occasionally
25	h25	Hong Kong	2	0	1	1	A	D	1	1	A	1	5	5	5	5	5	4	3	4	E	H	E	3	4	3	3	4	3	5	3	3	3	3	4	3	2	4	3	3	1	2	4	5	3		A.Yes	B.Occasionally	D.Frequently
26	h26	Hong Kong	2	0	1	1	A	D	1	1	A	1	5	5	5	4	5	3	5	5	E	H	C	5	3	4	5	5	3	3	4	4	4	4	3	3	2	4	4	3	1	2	5	5	3		A.Yes	B.Occasionally	E.Always
27	h27	Hong Kong	2	0	1	1	A	A	1	1	A	0	2	3	5	5	4	4	1	5	A	A	C	2	3	2	2	4	2	2	5	4	4	5	3	5	3	5	4	3	1	5	1	1	4		A.Yes	E.Always	A.Never
28	h28	Hong Kong	2	0	1	1	A	B	1	1	A	0	1	5	5	3	3	3	1	4	F	H	H	5	5	1	2	4	3	2	2	5	1	5	5	5	4	2	3	5	1	3	2	3	4		A.Yes	C.Sometimes	B.Occasionally
29	h29	Hong Kong	2	0	1	1	A	C	1	1	A	1	3	2	5	4	5	3	1	2	E	H	C	5	5	1	2	5	4	5	4	5	2	4	3	2	1	3	1	1	1	1	2	1	3		A.Yes	A.Never	B.Occasionally
30	h30	Hong Kong	2	0	1	1	A	B	1	1	A	0	5	3	3	5	4	4	4	4	C	C	C	3	5	5	3	3	3	3	3	3	3	4	3	3	3	3	3	3	1	5	3	5	5		A.Yes	E.Always	C.Sometimes
31	h31	Hong Kong	2	1	1	1	A	F	1	1	A	0	4	4	5	4	2	3	3	3	D	D	D	4	3	3	4	4	4	4	4	4	4	4	4	4	4	4	4	4	1	4	3	2	4		A.Yes	D.Frequently	C.Sometimes
32	h32	Hong Kong	2	1	1	1	G	A	1	1	A	0	1	3	5	5	5	4	1	2	E	H	H	4	4	2	2	3	3	3	3	3	3	3	3	3	3	3	3	3	1	2	2	1	2		A.Yes	B.Occasionally	B.Occasionally
33	h33	Hong Kong	2	1	1	1	C	F	1	1	A	0	3	4	5	4	5	4	2	2	D	D	C	5	5	1	2	2	5	5	5	5	4	5	4	5	5	5	2	1	1	1	2	5	3		A.Yes	A.Never	B.Occasionally
34	h34	Hong Kong	2	1	1	1	C	F	1	1	A	1	5	2	5	4	4	3	4	2	F	F	F	4	5	4	4	4	3	4	4	3	4	4	3	4	3	4	2	4	1	1	2	2	2		A.Yes	A.Never	B.Occasionally
35	h35	Hong Kong	2	0	1	1	C	G	1	1	A	0	1	4	2	3	2	2	1	5	B	C	C	3	5	3	2	3	4	2	1	3	3	5	5	4	5	3	3	4	0	1	1	1	1		B.No	A.Never	A.Never
36	h36	Hong Kong	2	1	1	1	A	F	1	1	A	0	1	4	4	5	5	4	1	3	B	H	C	5	5	1	1	4	3	2	2	4	2	4	4	4	1	2	4	4	1	1	1	1	5		A.Yes	A.Never	A.Never
37	h37	Hong Kong	2	1	1	1	A	F	1	1	A	1	4	3	4	3	4	3	1	3	C	C	C	5	5	2	2	4	4	4	3	4	3	4	3	4	3	3	3	3	0	1	1	1	1		B.No	A.Never	A.Never
38	h38	Hong Kong	2	1	1	1	C	G	1	1	A	0	1	4	3	4	3	4	4	5	D	H	D	3	2	2	4	2	2	1	3	4	4	5	5	5	5	4	3	3	1	5	1	1	4		A.Yes	E.Always	A.Never
39	h39	Hong Kong	2	0	1	1	C	C	1	1	A	0	2	4	5	3	5	4	3	5	C	B	D	3	5	2	2	5	2	2	2	4	3	4	5	5	3	4	4	4	0	1	1	1	1		B.No	A.Never	A.Never
40	h40	Hong Kong	2	1	1	1	A	F	1	1	A	0	2	3	5	4	3	3	1	5	C	D	C	4	4	3	2	5	4	3	4	3	5	5	5	5	5	3	4	5	0	5	1	1	3		B.No	E.Always	A.Never
41	h41	Hong Kong	2	1	1	1	A	A	1	1	A	0	1	5	5	4	3	4	1	5	C	E	C	4	5	4	2	5	5	3	2	2	2	4	5	5	5	5	2	5	1	1	3	2	4		A.Yes	A.Never	C.Sometimes
42	h42	Hong Kong	2	1	1	1	A	F	1	1	A	0	1	4	5	5	5	2	1	1	C	C	C	5	5	1	2	2	3	1	1	3	2	5	4	3	2	3	2	2	0	1	1	1	1		B.No	A.Never	A.Never
43	h43	Hong Kong	2	1	1	1	A	F	1	1	A	0	1	3	5	4	5	3	1	2	C	H	C	4	4	2	3	3	4	2	2	4	4	4	4	3	2	3	4	3	0	2	2	5	4		B.No	B.Occasionally	B.Occasionally
44	h44	Hong Kong	2	1	1	1	C	G	1	0	A	0	3	4	5	5	4	3	2	3	B	F	B	3	4	3	4	5	4	4	4	2	2	4	4	3	3	3	3	4	0	3	2	3	2		B.No	C.Sometimes	B.Occasionally
45	h45	Hong Kong	2	1	1	1	C	F	1	1	A	0	2	3	5	5	5	4	3	3	D	D	D	3	3	3	3	3	3	3	5	2	2	3	3	3	3	4	3	3	1	1	1	1	1		A.Yes	A.Never	A.Never
46	h46	Hong Kong	2	1	1	1	C	F	1	1	A	0	5	4	4	4	4	4	4	4	B	B	C	4	5	2	4	4	4	4	4	4	4	4	4	4	4	4	4	4	0	3	3	3	3		B.No	C.Sometimes	C.Sometimes
47	h47	Hong Kong	2	1	1	1	A	A	1	1	A	0	3	5	4	5	5	1	1	3	C	C	C	5	5	2	3	5	2	2	1	4	2	5	4	5	5	2	5	5	0	1	1	1	1		B.No	A.Never	A.Never
48	h48	Hong Kong	2	1	0	1	A	A	1	0	D	0	1	3	5	4	4	3	1	4	B	B	B	3	4	3	4	4	3	4	2	4	3	3	4	3	2	2	2	1	1	1	2	1	5		A.Yes	A.Never	B.Occasionally
49	h49	Hong Kong	2	1	1	1	C	C	1	1	A	1	5	4	5	4	2	3	1	3	D	H	C	5	3	2	2	2	3	3	4	4	4	5	5	5	4	4	4	4	1	5	5	5	4		A.Yes	E.Always	E.Always
50	h50	Hong Kong	2	1	1	1	A	G	1	1	A	0	1	4	5	5	4	5	2	4	C	C	C	4	4	4	4	4	4	4	4	4	4	4	4	4	4	4	4	4	0	2	4	4	3		B.No	B.Occasionally	D.Frequently
51	h51	Hong Kong	2	1	0	1	A	A	1	0	G	0	1	4	5	4	4	5	1	5	C	H	C	4	4	2	1	3	4	2	4	2	3	5	5	4	5	5	2	2	0	1	1	1	5		B.No	A.Never	A.Never
52	h52	Hong Kong	2	0	1	1	A	F	1	1	A	0	5	4	5	4	3	3	2	4	B	D	C	4	5	2	3	4	4	4	4	4	3	4	5	5	3	4	3	3	1	1	2	3	5		A.Yes	A.Never	B.Occasionally
53	h53	Hong Kong	2	1	1	0	A	A	1	1	A	1	4	5	5	4	4	2	1	4	C	C	C	5	4	1	2	1	4	3	3	2	2	4	2	3	4	2	2	3	0	2	2	4	1		B.No	B.Occasionally	B.Occasionally
54	h54	Hong Kong	2	0	1	1	A	B	1	1	A	0	1	2	4	4	2	4	1	3	B	B	C	4	4	2	4	5	3	2	1	4	2	5	5	5	2	2	4	4	0	1	1	1	1		B.No	A.Never	A.Never
55	h55	Hong Kong	2	0	1	1	A	B	1	1	A	1	2	4	5	5	4	4	1	4	F	C	H	4	5	2	2	4	3	3	3	2	2	4	4	4	5	2	4	4	0	1	1	1	1		B.No	A.Never	A.Never
56	h56	Hong Kong	2	0	1	1	A	B	1	1	A	0	1	5	5	5	5	5	1	5	D	F	D	3	4	3	4	4	3	4	2	3	3	5	5	3	5	4	4	5	0	1	1	1	1		B.No	A.Never	A.Never
57	h57	Hong Kong	2	0	1	1	A	B	1	1	A	0	4	4	3	3	1	1	1	3	E	E	C	4	5	3	2	4	4	2	1	4	4	5	5	5	2	4	5	2	0	4	2	4	3		B.No	D.Frequently	B.Occasionally
58	h58	Hong Kong	2	0	1	1	B	G	1	1	A	0	1	1	5	5	1	4	1	5	C	H	C	1	5	1	3	1	3	3	5	1	5	1	5	5	5	1	5	5	0	1	1	1	1		B.No	A.Never	A.Never
59	h59	Hong Kong	2	0	1	1	C	C	1	1	A	1	3	3	3	5	1	1	1	1	C	E	C	4	4	2	1	5	3	3	1	3	5	2	3	4	2	3	2	2	1	1	3	2	3		A.Yes	A.Never	C.Sometimes
60	h60	Hong Kong	2	0	1	1	C	B	1	1	A	0	4	3	5	4	2	2	2	4	F	F	F	4	4	2	2	3	4	4	4	4	4	4	4	4	4	4	4	3	0	3	3	4	2		B.No	C.Sometimes	C.Sometimes
61	h61	Hong Kong	2	0	1	1	C	C	1	1	A	1	5	4	4	5	4	2	1	2	F	H	D	4	4	1	2	4	3	4	5	3	1	3	4	4	2	5	3	3	0	1	4	5	1		B.No	A.Never	D.Frequently
62	h62	Hong Kong	2	1	1	1	A	F	1	1	A	0	1	3	4	4	4	4	2	4	D	F	F	4	5	4	2	5	3	4	5	2	4	4	4	4	4	3	4	5	1	4	3	5	4		A.Yes	D.Frequently	C.Sometimes
63	h63	Hong Kong	2	1	1	1	C	G	1	1	A	0	3	3	5	4	4	3	2	4	F	F	D	4	4	2	3	3	3	3	2	4	4	4	4	4	4	4	4	3	0	3	3	5	2		B.No	C.Sometimes	C.Sometimes
64	h64	Hong Kong	2	1	1	1	A	F	1	1	A	1	5	4	5	5	4	3	3	3	E	E	E	4	4	4	4	4	4	4	4	3	4	4	3	4	3	4	3	3	1	1	3	3	3		A.Yes	A.Never	C.Sometimes
65	h65	Hong Kong	2	1	1	1	A	G	1	1	A	1	4	2	5	5	4	1	1	1	F	E	C	3	5	1	1	4	3	4	4	1	1	5	5	4	5	5	5	3	0	1	4	5	1		B.No	A.Never	D.Frequently
66	h66	Hong Kong	2	1	1	1	A	F	1	1	A	0	5	5	5	5	4	4	1	4	F	H	F	3	4	3	3	4	3	2	4	4	4	5	4	4	4	5	4	4	0	4	4	4	4		B.No	D.Frequently	D.Frequently
67	h67	Hong Kong	2	1	1	1	C	F	1	1	A	0	1	4	5	4	3	4	1	2	C	B	C	4	5	2	2	2	4	1	1	2	1	5	5	5	5	4	4	5	0	2	2	4	3		B.No	B.Occasionally	B.Occasionally
68	h68	Hong Kong	2	1	1	1	A	F	1	1	A	0	1	4	4	4	3	3	1	4	H	H	H	4	4	4	2	5	3	3	3	2	3	3	3	4	3	4	4	4	0	1	1	1	1		B.No	A.Never	A.Never
69	h69	Hong Kong	2	1	1	1	A	F	1	1	A	1	3	3	5	3	5	3	1	5	E	B	B	5	5	5	4	5	5	4	5	3	2	5	4	5	5	5	5	2	1	1	4	4	2		A.Yes	A.Never	D.Frequently
70	h70	Hong Kong	2	1	1	1	C	F	1	1	A	1	5	4	4	4	1	1	1	5	C	B	C	4	4	2	2	4	3	4	2	1	3	4	4	4	4	5	4	4	0	1	1	1	1		B.No	A.Never	A.Never
71	h71	Hong Kong	2	1	1	1	A	F	1	1	A	0	1	4	5	4	4	1	1	3	C	C	C	4	5	4	2	4	4	4	1	1	4	1	3	5	2	4	5	4	0	3	4	5	2		B.No	C.Sometimes	D.Frequently
72	h72	Hong Kong	2	1	1	1	A	F	1	1	A	0	5	3	5	3	3	3	2	4	C	C	C	5	5	1	1	4	3	2	2	3	2	4	4	4	4	4	4	4	0	5	2	5	4		B.No	E.Always	B.Occasionally
73	h73	Hong Kong	2	1	1	1	C	F	1	1	A	0	1	4	3	3	4	4	3	5	C	C	C	4	4	3	4	4	4	2	2	4	3	4	5	4	2	4	4	3	1	1	2	2	5		A.Yes	A.Never	B.Occasionally
74	h74	Hong Kong	2	0	1	1	A	F	1	1	A	0	1	5	5	5	5	4	1	3	B	H	C	2	4	4	1	5	4	4	1	5	1	5	5	3	1	1	5	5	1	1	2	4	4		A.Yes	A.Never	B.Occasionally
75	h75	Hong Kong	2	1	1	1	A	F	1	1	A	0	2	3	4	5	5	1	1	2	C	H	C	4	5	2	1	4	4	3	2	3	2	4	4	4	5	4	4	5	1	1	2	4	1		A.Yes	A.Never	B.Occasionally
76	h76	Hong Kong	2	1	0	0	A	A	1	0	E	0	4	3	4	4	4	3	1	3	D	D	E	3	4	2	2	4	3	4	2	2	3	2	2	3	1	4	3	2	0	1	1	1	1		B.No	A.Never	A.Never
77	h77	Hong Kong	2	1	0	0	A	A	1	0	E	0	2	3	5	4	3	2	2	2	B	B	C	5	5	2	2	4	4	1	1	2	4	4	4	3	2	2	3	1	1	3	2	1	4		A.Yes	C.Sometimes	B.Occasionally
78	h78	Hong Kong	2	1	0	0	A	A	1	0	E	0	2	2	5	5	2	2	1	2	C	C	C	1	5	2	3	5	4	1	2	3	4	3	5	3	3	3	3	3	0	3	2	4	1		B.No	C.Sometimes	B.Occasionally
79	h79	Hong Kong	2	0	0	0	A	A	1	0	E	0	1	2	5	5	5	3	1	5	D	D	D	4	5	2	4	4	2	4	4	5	4	2	4	2	2	4	4	2	1	3	5	5	2		A.Yes	C.Sometimes	E.Always
80	h80	Hong Kong	2	0	1	1	C	B	1	1	A	1	3	5	3	5	3	1	1	1	F	A	A	2	5	2	4	2	3	5	5	2	4	4	5	4	1	4	4	1	0	2	3	2	2		B.No	B.Occasionally	C.Sometimes
81	h81	Hong Kong	2	0	1	0	C	G	1	1	A	0	1	4	5	4	4	4	1	4	B	H	D	2	4	1	2	4	4	2	3	2	2	4	4	3	5	5	5	5	1	1	3	2	5		A.Yes	A.Never	C.Sometimes
82	h82	Hong Kong	2	1	0	0	A	A	0	0	E	0	2	4	4	4	1	1	1	1	A	H	C	1	3	1	3	5	1	1	1	5	5	5	5	5	2	3	5	3	1	5	2	1	3		A.Yes	E.Always	B.Occasionally
83	h83	Hong Kong	2	0	0	0	A	A	1	0	E	0	1	4	5	5	4	3	1	4	D	B	C	4	4	3	3	5	4	3	5	5	5	5	5	5	4	4	4	4	1	4	2	4	4		A.Yes	D.Frequently	B.Occasionally
84	h84	Hong Kong	2	1	0	0	A	A	0	0	E	1	4	2	4	5	4	2	1	4	H	H	E	5	4	2	1	5	4	4	5	2	3	5	5	2	2	4	3	2	1	3	4	4	2		A.Yes	C.Sometimes	D.Frequently
85	h85	Hong Kong	2	1	1	1	A	G	1	1	A	0	2	4	5	4	4	4	3	5	D	H	D	5	3	3	3	4	4	4	3	4	4	4	5	5	5	2	4	4	0	1	2	5	2		B.No	A.Never	B.Occasionally
86	h86	Hong Kong	2	0	1	1	A	D	1	1	A	1	5	4	5	3	2	3	1	4	F	E	C	4	4	2	3	4	2	2	3	4	1	5	4	4	4	5	4	4	1	2	4	4	2		A.Yes	B.Occasionally	D.Frequently
87	h87	Hong Kong	2	1	1	1	A	A	1	1	A	1	5	2	5	5	3	4	1	4	F	H	D	3	4	2	2	3	4	4	4	2	2	5	5	4	5	5	2	2	0	1	1	1	1		B.No	A.Never	A.Never
88	h88	Hong Kong	2	1	1	1	C	F	1	1	A	0	1	5	4	4	5	5	2	5	B	E	C	4	2	2	4	4	2	4	1	3	4	5	5	5	5	4	5	5	1	1	2	5	3		A.Yes	A.Never	B.Occasionally
89	h89	Hong Kong	2	1	1	1	A	F	1	1	A	0	5	5	3	4	2	4	1	1	B	H	C	3	2	2	3	4	4	2	3	4	3	4	4	4	3	3	4	3	1	1	2	2	5		A.Yes	A.Never	B.Occasionally
90	h90	Hong Kong	2	0	1	1	C	F	1	1	A	0	4	5	5	5	4	1	1	4	D	H	H	4	5	2	3	4	2	1	1	3	3	4	4	5	5	5	5	5	0	1	1	1	1		B.No	A.Never	A.Never
91	h91	Hong Kong	2	0	1	0	A	A	1	0	A	1	5	4	5	4	3	3	1	4	E	E	C	5	4	2	3	4	4	4	4	4	3	4	4	2	3	4	4	4	1	4	2	1	4		A.Yes	D.Frequently	B.Occasionally
92	h92	Hong Kong	2	0	1	0	A	A	1	1	A	0	3	2	3	2	4	2	1	1	D	D	D	2	3	3	4	3	2	2	2	4	3	4	4	3	2	4	2	2	0	1	1	1	1		B.No	A.Never	A.Never
93	h93	Hong Kong	2	1	0	0	A	B	1	0	E	0	2	2	5	5	2	3	3	4	B	E	D	5	5	2	2	3	3	4	4	4	3	5	5	5	4	4	4	4	1	2	2	2	4		A.Yes	B.Occasionally	B.Occasionally
94	h94	Hong Kong	2	1	0	0	A	A	1	0	E	0	4	4	5	5	5	3	1	5	D	E	D	2	5	3	2	4	2	2	4	5	5	3	4	4	5	5	3	2	1	5	4	5	5		A.Yes	E.Always	D.Frequently
95	h95	Hong Kong	2	0	1	0	A	B	1	1	A	0	1	3	3	4	3	4	1	4	D	D	D	5	1	2	3	5	3	2	2	4	2	3	3	4	4	5	3	3	1	4	4	4	4		A.Yes	D.Frequently	D.Frequently
96	h96	Hong Kong	2	0	1	1	A	F	1	1	A	0	1	3	4	4	4	5	1	5	B	E	D	2	4	3	2	5	4	2	2	4	4	5	5	5	4	3	4	4	1	5	1	1	5		A.Yes	E.Always	A.Never
97	h97	Hong Kong	2	0	0	0	A	A	1	0	E	0	1	1	3	2	2	1	1	4	D	D	D	1	3	2	3	4	3	2	2	4	4	3	4	3	1	2	2	2	1	5	2	4	4		A.Yes	E.Always	B.Occasionally
98	h98	Hong Kong	2	0	0	0	A	A	0	0	E	1	4	3	4	5	3	1	1	1	H	H	E	3	3	2	2	3	4	3	3	3	5	2	2	1	1	5	3	3	0	3	3	3	3		B.No	C.Sometimes	C.Sometimes
99	h99	Hong Kong	2	1	0	0	A	A	1	0	E	0	3	5	3	5	3	4	1	5	B	E	B	2	2	3	5	3	1	1	1	2	4	5	5	5	5	5	5	5	1	3	3	3	3		A.Yes	C.Sometimes	C.Sometimes
100	h100	Hong Kong	2	1	0	0	A	G	1	0	E	0	1	4	5	5	4	5	1	2	D	D	D	1	1	5	5	3	2	1	1	5	5	5	5	4	1	1	4	3	1	5	2	5	5		A.Yes	E.Always	B.Occasionally
101	h101	Hong Kong	2	0	0	1	A	G	1	0	G	0	1	5	5	3	3	3	1	4	A	E	D	3	5	2	1	4	5	5	5	4	4	5	5	5	5	3	5	5	0	3	3	3	3		B.No	C.Sometimes	C.Sometimes
102	h102	Hong Kong	2	1	0	1	C	C	1	0	F	0	3	4	5	5	3	4	1	5	D	D	D	4	5	1	1	2	2	1	4	2	2	5	5	5	5	5	5	5	1	4	3	5	5		A.Yes	D.Frequently	C.Sometimes
103	h103	Hong Kong	2	1	1	1	G	B	1	1	A	1	2	2	5	4	1	1	1	2	B	F	E	1	4	3	4	4	4	1	3	5	4	5	5	2	1	4	4	4	1	5	1	1	3		A.Yes	E.Always	A.Never
104	h104	Hong Kong	2	1	1	1	B	B	1	0	A	0	3	2	5	5	4	4	1	4	D	H	C	5	1	4	4	4	4	4	5	4	4	4	5	5	5	5	4	2	1	2	3	1	4		A.Yes	B.Occasionally	C.Sometimes
105	h105	Hong Kong	2	1	0	0	C	B	1	0	G	0	1	5	5	5	4	3	1	2	B	C	E	5	4	3	3	4	4	4	4	3	3	3	4	4	3	4	3	3	1	4	2	2	4		A.Yes	D.Frequently	B.Occasionally
66	m66	Macau	3	1	0	1	B	D	0	0	E	0	1	3	3	3	3	3	3	3	D	D	D	4	4	3	3	3	3	3	3	4	4	4	4	3	4	3	3	3	0	2	3	4	2		B.否	B.偶爾	C.有時
61	m61	Macau	3	0	1	1	A	C	1	1	A	0	1	5	5	5	5	5	5	5	G	H	C	5	5	5	5	5	5	5	5	5	5	5	5	5	5	5	5	5	1	5	5	5	5		A.是	E.總是	E.總是
32	m32	Macau	3	1	1	1	C	A	1	0	A	0	1	1	4	2	2	4	1	3	B	B	C	4	2	2	4	3	2	1	1	4	3	4	4	5	4	3	3	3	1	1	2	1	5		A.是	A.從不	B.偶爾
65	m65	Macau	3	1	1	1	C	A	1	0	A	0	1	2	4	3	2	2	1	3	B	B	C	4	3	3	2	2	1	1	1	4	4	4	4	4	5	3	2	4	1	1	2	1	5		A.是	A.從不	B.偶爾
8	m8	Macau	3	1	1	1	A	A	1	1	A	0	3	1	5	5	5	1	1	3	H	E	C	5	5	3	1	3	3	1	1	3	3	4	5	1	5	4	5	5	1	1	3	3	3		A.是	A.從不	C.有時
16	m16	Macau	3	0	1	1	A	A	1	1	A	0	1	4	3	3	3	4	1	3	B	H	D	5	4	2	2	4	3	2	2	4	2	5	5	5	3	5	5	3	1	1	2	1	5		A.是	A.從不	B.偶爾
96	m96	Macau	3	1	0	1	A	A	1	0	E	1	4	2	4	5	4	3	1	1	E	E	C	5	5	3	3	3	4	4	4	4	2	3	3	3	3	3	3	3	1	1	3	2	3		A.是	A.從不	C.有時
82	m82	Macau	3	0	0	1	A	A	1	0	E	1	4	2	4	3	4	4	1	1	E	E	E	5	5	3	3	3	3	5	4	4	3	1	2	3	1	3	2	2	1	1	4	1	2		A.是	A.從不	D.經常
6	m6	Macau	3	1	1	1	A	A	1	1	A	0	3	3	5	4	4	4	1	4	D	E	D	4	2	3	2	3	3	2	2	4	3	3	4	4	3	4	4	4	1	2	3	5	4		A.是	B.偶爾	C.有時
44	m44	Macau	3	1	1	1	A	A	1	1	A	1	1	1	4	3	3	3	1	3	B	B	F	2	2	3	3	3	3	1	1	3	3	3	3	4	2	2	3	3	1	1	3	2	4		A.是	A.從不	C.有時
38	m38	Macau	3	1	0	1	A	D	0	0	B	0	1	3	5	5	5	3	3	3	B	H	D	4	4	4	3	5	4	3	3	3	3	3	3	3	3	3	3	3	1	1	3	1	4		A.是	A.從不	C.有時
115	m115	Macau	3	1	1	1	A	D	1	1	A	0	1	2	5	3	3	4	2	5	C	H	A	4	2	3	2	2	4	2	2	4	2	4	4	5	4	5	4	3	1	1	1	3	5		A.是	A.從不	A.從不
114	m114	Macau	3	1	0	1	A	D	1	0	F	0	3	3	5	4	5	5	1	5	D	D	D	5	3	3	3	3	3	3	3	3	3	3	3	3	3	3	3	3	1	1	2	4	1		A.是	A.從不	B.偶爾
104	m104	Macau	3	1	1	1	A	D	1	1	A	0	1	3	4	4	4	5	1	4	C	C	C	5	5	2	5	4	4	3	5	5	4	5	5	5	4	3	4	4	1	2	4	4	2		A.是	B.偶爾	D.經常
94	m94	Macau	3	0	0	1	A	D	1	1	E	0	3	4	4	4	4	4	4	4	D	E	D	4	4	4	4	3	4	4	4	4	4	4	4	4	4	4	4	4	1	1	3	1	4		A.是	A.從不	C.有時
84	m84	Macau	3	1	0	1	A	D	1	0	B	1	5	3	5	4	5	4	1	2	E	E	B	5	5	2	1	5	2	4	5	5	3	5	5	5	5	5	5	5	1	1	4	4	4		A.是	A.從不	D.經常
112	m112	Macau	3	1	1	1	A	D	1	1	A	1	4	4	5	4	5	4	1	3	E	E	D	1	3	2	1	2	2	3	4	3	3	4	5	5	4	4	3	3	0	1	4	5	2		B.否	A.從不	D.經常
98	m98	Macau	3	1	0	1	A	D	1	0	B	0	2	2	4	4	3	4	1	4	D	H	D	5	4	3	3	3	4	3	3	3	3	4	4	4	2	4	3	3	1	4	3	4	4		A.是	D.經常	C.有時
1	m1	Macau	3	0	0	1	A	D	1	0	E	1	5	5	5	5	5	5	4	5	E	B	F	5	4	1	1	4	4	2	2	1	1	3	4	4	4	4	4	4	1	2	4	3	2		A.是	B.偶爾	D.經常
28	m28	Macau	3	1	0	1	A	D	1	0	E	0	1	5	5	4	5	3	1	4	F	H	F	3	3	3	3	3	3	3	3	3	3	3	3	3	3	3	3	3	1	1	1	1	5		A.是	A.從不	A.從不
107	m107	Macau	3	0	0	1	B	D	0	0	E	0	1	2	5	3	2	2	1	4	H	B	C	5	5	3	3	3	4	4	4	1	4	3	3	4	4	2	4	4	1	1	4	3	4		A.是	A.從不	D.經常
79	m79	Macau	3	0	0	1	A	D	1	0	E	0	1	3	5	4	3	3	3	3	B	H	D	3	3	3	3	3	3	3	3	3	3	3	3	3	3	3	3	3	1	1	2	2	4		A.是	A.從不	B.偶爾
102	m102	Macau	3	0	0	1	A	D	1	0	E	0	3	4	3	4	3	3	4	3	D	E	F	4	4	4	4	4	3	4	3	4	4	4	4	4	3	3	4	4	1	1	4	4	4		A.是	A.從不	D.經常
4	m4	Macau	3	0	0	1	A	D	1	0	E	0	1	2	3	4	3	3	1	4	B	B	F	4	3	3	2	4	4	3	4	3	4	3	4	3	3	3	4	4	1	4	2	1	4		A.是	D.經常	B.偶爾
3	m3	Macau	3	0	0	1	A	D	1	0	E	0	2	3	4	3	3	3	1	3	D	E	D	5	5	3	3	3	2	4	4	4	4	3	3	4	4	4	4	4	1	1	2	1	4		A.是	A.從不	B.偶爾
68	m68	Macau	3	1	1	1	A	D	1	1	A	0	1	3	4	4	2	4	2	4	D	D	D	5	4	3	3	4	4	3	3	4	3	4	4	4	4	5	4	4	1	1	1	4	4		A.是	A.從不	A.從不
67	m67	Macau	3	1	1	1	A	D	1	1	A	1	3	1	2	5	5	1	1	1	E	A	C	5	5	3	3	1	1	5	5	4	5	2	5	5	5	4	1	1	1	3	4	2	2		A.是	C.有時	D.經常
105	m105	Macau	3	1	1	1	A	D	1	1	A	0	2	3	5	4	2	4	1	4	H	H	H	3	3	3	3	3	3	3	3	3	3	3	3	3	3	3	3	3	1	5	3	1	5		A.是	E.總是	C.有時
7	m7	Macau	3	0	1	1	A	D	1	1	A	1	5	5	5	3	4	4	1	3	E	E	C	4	5	2	1	4	3	4	4	4	2	4	4	4	2	4	3	3	0	1	4	5	2		B.否	A.從不	D.經常
106	m106	Macau	3	0	1	1	A	D	1	1	A	0	4	4	5	4	3	4	1	4	E	F	A	4	4	4	2	3	4	2	5	4	4	3	4	4	2	2	3	4	1	4	4	2	3		A.是	D.經常	D.經常
62	m62	Macau	3	0	0	1	B	D	1	0	G	0	1	3	4	3	3	4	4	4	B	B	C	5	5	4	4	4	4	5	4	4	4	5	4	4	4	4	5	4	1	4	3	4	5		A.是	D.經常	C.有時
26	m26	Macau	3	0	0	1	A	G	0	0	B	0	5	4	5	4	3	3	1	4	B	B	C	4	4	3	2	3	3	3	2	4	3	3	3	4	3	4	4	3	1	1	4	4	5		A.是	A.從不	D.經常
27	m27	Macau	3	1	1	1	A	D	1	1	A	1	3	2	4	4	2	5	2	3	F	H	F	5	5	3	1	2	4	3	2	4	3	2	4	4	4	4	4	4	1	1	4	2	2		A.是	A.從不	D.經常
77	m77	Macau	3	1	1	1	A	D	1	1	A	0	4	2	5	4	4	4	1	3	F	H	F	5	4	2	2	5	3	2	4	4	3	3	4	3	4	5	4	3	1	1	3	4	5		A.是	A.從不	C.有時
33	m33	Macau	3	1	0	1	A	D	0	0	F	1	3	4	4	5	4	5	1	4	C	H	E	4	4	3	3	4	5	4	2	5	3	4	2	3	4	5	3	3	1	1	3	4	1		A.是	A.從不	C.有時
95	m95	Macau	3	1	0	1	A	D	1	0	F	1	4	4	4	4	3	2	1	4	E	D	F	4	3	3	3	2	4	4	4	5	3	4	4	5	3	4	3	2	1	1	3	4	3		A.是	A.從不	C.有時
75	m75	Macau	3	0	1	1	A	D	1	1	A	1	3	2	5	4	4	4	3	5	D	H	D	5	5	4	3	4	2	2	2	4	3	4	5	4	4	4	4	4	0	1	3	4	4		B.否	A.從不	C.有時
29	m29	Macau	3	0	1	1	A	D	1	1	A	0	3	3	4	2	5	3	1	5	D	E	D	5	3	3	4	4	4	5	4	3	2	3	4	3	1	5	3	3	0	4	3	5	2		B.否	D.經常	C.有時
25	m25	Macau	3	1	1	1	A	D	1	1	A	0	1	3	3	3	3	3	3	3	C	F	D	3	3	3	3	3	3	3	3	3	3	3	3	3	3	3	3	3	1	1	2	3	2		A.是	A.從不	B.偶爾
87	m87	Macau	3	1	0	1	A	D	1	0	F	0	1	3	5	4	4	5	1	5	D	D	D	5	2	3	4	3	4	1	1	4	3	5	5	5	5	4	5	5	1	1	3	4	4		A.是	A.從不	C.有時
110	m110	Macau	3	0	0	1	A	D	1	0	E	0	1	3	5	5	3	3	3	3	H	H	C	3	3	3	3	3	3	3	3	3	3	3	3	3	3	3	3	3	1	1	2	2	4		A.是	A.從不	B.偶爾
21	m21	Macau	3	1	0	1	A	D	1	1	C	0	1	2	5	5	2	1	1	4	C	C	C	4	2	2	4	5	3	1	3	5	4	5	5	4	3	3	4	5	1	1	3	1	5		A.是	A.從不	C.有時
18	m18	Macau	3	1	0	1	A	B	1	0	E	0	1	4	5	3	4	5	2	4	D	D	D	5	3	3	2	4	3	2	1	4	4	4	5	5	3	4	5	5	1	1	2	5	5		A.是	A.從不	B.偶爾
23	m23	Macau	3	1	1	1	A	D	1	0	A	1	3	5	5	3	4	3	1	4	E	G	F	5	2	4	4	4	4	3	4	4	4	4	4	4	4	3	3	3	0	1	5	5	5		B.否	A.從不	E.總是
15	m15	Macau	3	1	0	1	C	D	0	0	F	0	1	3	4	5	4	4	4	4	B	E	F	3	4	3	3	3	3	3	3	3	3	3	3	3	3	3	3	3	1	4	3	2	3		A.是	D.經常	C.有時
53	m53	Macau	3	1	0	1	C	D	0	0	F	0	2	4	5	5	4	4	4	4	B	E	D	4	4	4	4	4	4	4	4	4	4	5	4	4	5	4	5	4	1	4	3	2	1		A.是	D.經常	C.有時
70	m70	Macau	3	1	0	1	A	D	0	0	E	0	2	3	4	4	4	4	1	4	D	E	D	5	3	2	4	4	4	2	2	2	2	3	3	3	3	3	3	2	1	1	4	4	4		A.是	A.從不	D.經常
59	m59	Macau	3	1	0	1	A	D	1	1	G	0	3	2	5	5	5	5	1	3	D	E	D	4	3	3	4	4	2	3	3	3	3	3	4	4	4	4	4	4	1	3	3	4	3		A.是	C.有時	C.有時
5	m5	Macau	3	1	0	1	A	D	0	0	B	1	3	3	5	5	3	4	2	3	E	C	C	4	3	2	2	5	2	3	3	3	2	3	4	4	3	4	3	3	1	3	4	2	2		A.是	C.有時	D.經常
19	m19	Macau	3	1	0	1	A	D	0	0	E	0	5	3	4	3	3	4	2	2	C	H	C	3	3	3	3	3	2	1	1	5	2	5	5	5	3	3	3	3	1	1	3	5	3		A.是	A.從不	C.有時
111	m111	Macau	3	1	0	1	A	D	1	0	E	0	1	3	5	5	5	3	1	4	C	D	F	4	3	3	4	4	4	2	1	5	3	4	3	3	3	3	3	3	1	5	2	5	5		A.是	E.總是	B.偶爾
92	m92	Macau	3	1	1	1	C	D	1	1	A	1	5	2	5	4	2	3	3	5	E	E	C	4	5	2	1	3	3	4	4	4	3	4	5	5	2	4	4	3	1	1	5	5	2		A.是	A.從不	E.總是
113	m113	Macau	3	1	1	1	A	D	1	0	A	0	1	5	5	5	3	3	1	1	C	H	C	5	4	3	1	4	2	2	2	4	3	2	4	4	2	2	4	2	1	1	2	1	5		A.是	A.從不	B.偶爾
118	m118	Macau	3	1	1	1	B	D	1	0	A	1	5	5	5	5	5	5	2	5	E	H	B	3	3	2	2	2	2	4	2	3	3	2	3	3	3	3	3	3	1	1	5	1	5		A.是	A.從不	E.總是
9	m9	Macau	3	1	0	1	A	D	0	0	E	0	3	3	4	4	3	3	3	3	C	E	C	4	3	3	2	3	3	3	3	3	3	3	3	3	3	3	3	3	1	1	2	4	3		A.是	A.從不	B.偶爾
22	m22	Macau	3	1	0	1	A	D	0	0	E	0	4	2	2	5	2	4	1	3	B	E	D	4	5	2	4	4	4	5	4	3	2	4	4	4	3	5	5	5	1	1	3	2	4		A.是	A.從不	C.有時
50	m50	Macau	3	1	0	1	A	D	1	0	E	0	3	3	5	4	5	3	1	3	D	D	D	5	5	4	4	5	4	4	3	3	3	3	3	4	4	3	4	4	1	1	3	4	2		A.是	A.從不	C.有時
39	m39	Macau	3	1	0	1	A	D	0	0	E	0	2	3	3	4	5	5	1	4	C	E	C	5	4	4	4	3	4	5	4	3	3	4	5	4	3	4	4	2	1	1	3	1	5		A.是	A.從不	C.有時
80	m80	Macau	3	0	0	1	A	D	0	0	E	0	2	5	3	4	2	2	1	1	B	H	D	5	3	3	4	3	4	5	3	4	3	2	4	2	1	4	2	1	1	1	2	1	5		A.是	A.從不	B.偶爾
54	m54	Macau	3	1	1	1	A	D	1	1	A	1	5	3	5	3	1	4	1	4	C	E	C	5	3	3	5	4	3	3	2	4	4	4	5	5	5	4	3	3	1	1	2	5	3		A.是	A.從不	B.偶爾
58	m58	Macau	3	1	1	1	A	D	1	1	A	0	2	4	3	5	2	5	1	1	F	E	F	5	5	2	1	4	5	5	1	5	1	5	5	5	5	3	5	5	1	4	2	1	4		A.是	D.經常	B.偶爾
56	m56	Macau	3	1	1	1	A	D	1	1	A	0	1	2	4	3	5	3	1	3	C	H	C	5	2	3	3	3	3	3	2	4	3	4	5	5	3	2	3	3	1	4	2	1	1		A.是	D.經常	B.偶爾
17	m17	Macau	3	0	1	1	B	D	0	0	A	0	3	5	5	5	5	5	5	5	B	B	B	2	2	2	1	2	2	2	2	2	2	2	2	2	2	2	2	2	1	3	1	3	5		A.是	C.有時	A.從不
34	m34	Macau	3	0	0	1	A	D	0	0	G	0	1	2	5	5	4	4	1	3	B	B	C	3	3	3	3	3	3	3	3	3	3	3	3	3	3	3	3	3	1	2	2	2	5		A.是	B.偶爾	B.偶爾
101	m101	Macau	3	1	0	1	A	D	0	0	E	0	4	3	3	5	3	1	1	3	E	E	C	5	5	3	5	3	3	4	5	5	3	3	3	3	3	3	3	3	1	1	4	2	4		A.是	A.從不	D.經常
55	m55	Macau	3	1	0	1	B	D	0	0	E	0	1	3	5	2	3	2	2	4	D	D	D	4	3	3	4	3	4	4	2	4	4	3	4	4	4	3	4	3	1	1	2	4	4		A.是	A.從不	B.偶爾
35	m35	Macau	3	1	1	1	A	F	1	1	A	0	1	4	5	2	5	3	1	3	B	H	C	4	2	5	5	5	2	1	2	5	5	5	5	5	5	1	5	5	1	1	2	1	5		A.是	A.從不	B.偶爾
103	m103	Macau	3	1	0	1	A	B	1	0	E	0	1	3	3	3	3	3	3	3	C	C	C	3	3	3	3	3	3	3	3	3	3	3	3	3	3	3	3	3	1	3	3	5	5		A.是	C.有時	C.有時
52	m52	Macau	3	1	0	1	A	G	0	0	G	0	1	2	5	4	4	4	1	3	B	B	B	4	3	4	4	5	4	3	2	4	4	4	5	5	3	5	3	4	1	1	2	2	4		A.是	A.從不	B.偶爾
40	m40	Macau	3	1	0	1	B	F	0	0	G	0	1	4	5	4	5	4	3	3	B	D	B	5	4	3	2	2	4	3	2	3	3	4	5	5	4	5	4	5	1	1	2	1	4		A.是	A.從不	B.偶爾
46	m46	Macau	3	0	1	1	A	C	1	1	A	0	5	4	4	4	3	2	1	4	C	E	C	5	4	2	2	5	3	2	2	4	3	3	5	5	3	5	2	3	0	1	4	4	4		B.否	A.從不	D.經常
37	m37	Macau	3	0	1	1	C	C	1	1	A	1	4	4	5	3	4	3	3	4	E	E	E	3	4	4	2	4	2	2	2	3	3	4	3	4	4	3	3	4	1	2	5	4	2		A.是	B.偶爾	E.總是
64	m64	Macau	3	0	1	1	B	C	1	1	A	0	2	5	4	4	2	4	1	4	C	C	C	5	3	3	2	4	2	2	2	4	4	2	4	4	2	2	4	4	1	1	2	4	2		A.是	A.從不	B.偶爾
30	m30	Macau	3	0	1	1	B	C	1	1	A	0	1	1	5	1	1	1	1	3	B	H	C	1	1	3	3	5	3	3	3	3	3	4	2	3	1	5	4	1	1	5	2	2	5		A.是	E.總是	B.偶爾
100	m100	Macau	3	0	1	1	A	C	1	1	A	1	5	1	4	3	2	2	1	3	E	E	C	3	3	3	3	3	2	1	1	2	3	4	4	4	3	4	4	4	0	1	1	1	1		B.否	A.從不	A.從不
88	m88	Macau	3	0	0	1	A	C	1	0	G	0	2	4	5	5	3	4	1	3	B	B	D	4	3	3	4	4	4	5	4	4	4	5	4	4	4	5	3	2	1	1	2	3	4		A.是	A.從不	B.偶爾
108	m108	Macau	3	1	1	1	A	B	1	1	A	0	1	4	4	4	3	4	3	4	D	D	D	4	4	3	3	4	4	4	3	4	4	4	4	4	4	4	4	4	1	1	2	3	2		A.是	A.從不	B.偶爾
11	m11	Macau	3	0	1	1	A	B	1	1	A	0	3	2	5	4	5	4	1	4	C	H	C	4	4	2	1	4	3	4	4	4	2	4	4	3	3	3	3	3	1	1	3	1	4		A.是	A.從不	C.有時
116	m116	Macau	3	0	0	1	A	C	0	0	E	0	4	5	4	5	5	1	1	5	B	H	C	3	3	3	4	5	4	4	4	4	3	4	4	4	4	4	2	2	1	2	4	1	4		A.是	B.偶爾	D.經常
97	m97	Macau	3	1	1	1	A	G	1	1	A	0	2	3	5	5	3	3	1	5	C	C	D	5	2	3	3	3	2	3	3	5	3	4	5	5	3	2	3	3	1	2	3	3	3		A.是	B.偶爾	C.有時
20	m20	Macau	3	1	1	1	A	A	1	1	A	1	1	3	5	4	4	4	2	4	D	D	D	5	4	2	2	3	3	2	2	2	2	4	5	5	4	4	4	3	1	1	2	5	1		A.是	A.從不	B.偶爾
2	m2	Macau	3	0	1	1	A	G	1	1	A	0	3	4	4	3	4	3	2	4	B	E	B	5	4	3	3	3	4	3	2	5	4	4	4	4	5	4	4	4	1	1	3	1	5		A.是	A.從不	C.有時
14	m14	Macau	3	1	1	1	A	A	0	0	A	1	5	5	5	4	5	3	3	5	D	B	D	5	4	1	1	5	4	3	3	4	2	4	4	5	5	5	5	4	1	1	5	4	2		A.是	A.從不	E.總是
63	m63	Macau	3	1	0	1	A	A	1	0	E	0	2	5	5	5	4	4	2	4	E	E	C	4	3	3	2	4	4	4	3	4	3	2	4	4	4	5	4	4	1	1	4	1	4		A.是	A.從不	D.經常
36	m36	Macau	3	1	0	1	A	A	0	0	E	1	4	4	5	5	5	3	1	5	E	E	D	5	5	3	1	5	5	5	5	3	4	3	5	5	4	5	5	2	1	2	5	5	3		A.是	B.偶爾	E.總是
72	m72	Macau	3	1	1	1	C	E	1	1	A	0	1	2	2	2	2	2	1	4	B	E	E	2	5	2	1	2	3	2	5	4	3	2	5	4	2	4	2	4	1	1	3	2	3		A.是	A.從不	C.有時
60	m60	Macau	3	0	1	1	A	E	1	1	A	1	4	5	5	5	5	3	1	3	F	E	F	5	5	2	1	4	4	3	1	4	4	4	5	4	5	5	5	3	1	1	5	4	3		A.是	A.從不	E.總是
83	m83	Macau	3	0	1	1	A	E	1	1	A	0	1	3	5	3	1	1	1	4	B	B	C	5	3	1	1	5	3	3	4	3	3	5	5	5	3	3	3	5	1	1	2	1	3		A.是	A.從不	B.偶爾
43	m43	Macau	3	1	1	1	A	E	1	1	A	0	3	4	4	5	2	5	1	1	B	B	E	3	5	3	4	3	3	3	1	5	4	2	4	3	4	2	5	3	1	2	3	4	4		A.是	B.偶爾	C.有時
48	m48	Macau	3	1	1	1	A	E	0	1	A	0	3	2	5	2	4	5	1	1	B	F	B	4	4	3	3	4	4	3	3	4	4	5	5	4	4	4	4	5	1	2	3	1	4		A.是	B.偶爾	C.有時
10	m10	Macau	3	0	0	1	A	E	0	0	B	0	1	5	5	4	3	4	1	4	B	E	D	5	1	4	4	3	5	1	1	5	4	5	5	5	5	5	4	3	1	1	3	4	4		A.是	A.從不	C.有時
69	m69	Macau	3	0	0	1	A	E	0	0	B	0	1	4	5	4	3	3	3	5	B	B	D	5	4	4	4	4	3	2	2	4	4	4	4	4	4	3	4	4	1	1	3	2	4		A.是	A.從不	C.有時
57	m57	Macau	3	1	0	0	A	A	1	0	E	0	1	4	5	4	5	3	2	3	B	B	D	5	5	2	2	3	3	2	3	5	4	3	5	5	2	2	1	1	1	1	2	2	5		A.是	A.從不	B.偶爾
49	m49	Macau	3	1	0	0	A	A	1	0	E	0	1	3	4	4	4	3	1	3	E	E	C	4	4	3	3	3	3	3	3	3	3	4	4	4	3	4	3	3	1	1	3	2	4		A.是	A.從不	C.有時
93	m93	Macau	3	1	0	0	A	A	1	0	E	0	4	3	5	5	5	5	3	5	B	E	D	5	5	4	5	4	4	3	3	5	3	2	5	5	4	5	5	5	1	1	4	4	5		A.是	A.從不	D.經常
86	m86	Macau	3	1	0	0	A	A	1	0	E	0	3	2	4	3	2	2	2	4	D	D	D	4	4	2	2	3	3	3	3	3	3	4	4	4	4	2	4	4	1	1	3	4	4		A.是	A.從不	C.有時
78	m78	Macau	3	1	0	1	A	A	1	0	E	0	3	3	5	5	5	4	1	3	D	D	D	5	3	3	2	4	4	4	4	4	4	3	3	4	4	4	4	4	1	1	3	5	3		A.是	A.從不	C.有時
42	m42	Macau	3	0	1	1	A	A	1	1	A	1	5	5	5	4	3	3	1	3	E	H	D	5	3	2	1	1	3	4	5	5	1	5	5	4	5	5	4	3	0	1	3	5	2		B.否	A.從不	C.有時
73	m73	Macau	3	1	0	1	A	A	1	0	E	0	3	5	5	3	4	2	1	3	C	E	B	5	2	1	2	3	3	3	4	3	3	4	5	3	3	4	3	4	1	5	4	1	1		A.是	E.總是	D.經常
81	m81	Macau	3	1	1	1	A	A	1	0	A	0	2	3	4	4	3	4	3	2	E	E	C	5	4	3	2	3	3	4	3	3	3	3	4	4	4	4	4	2	0	1	4	5	2		B.否	A.從不	D.經常
41	m41	Macau	3	0	0	1	D	A	1	0	G	1	5	3	5	5	5	5	5	5	E	E	E	5	4	3	1	5	5	3	3	2	2	2	4	4	3	5	4	3	1	1	5	4	3		A.是	A.從不	E.總是
89	m89	Macau	3	1	1	1	A	A	1	0	A	0	3	3	5	5	5	5	3	5	D	D	D	5	4	2	3	2	2	2	2	3	2	3	3	4	4	4	4	4	1	1	3	5	3		A.是	A.從不	C.有時
109	m109	Macau	3	1	1	1	A	A	1	1	A	1	4	2	5	3	5	4	1	5	E	B	D	5	3	2	1	5	5	3	4	5	4	5	5	5	5	2	5	3	1	1	4	4	3		A.是	A.從不	D.經常
74	m74	Macau	3	1	0	1	A	A	0	0	F	0	3	5	5	5	5	3	1	5	D	D	D	5	3	3	3	4	5	2	4	4	3	5	5	5	5	2	5	5	1	1	2	1	4		A.是	A.從不	B.偶爾
12	m12	Macau	3	0	0	1	A	A	1	0	E	0	5	3	5	4	3	3	3	1	B	B	C	5	2	3	3	5	5	5	3	4	3	1	3	3	1	5	1	1	1	1	4	1	4		A.是	A.從不	D.經常
13	m13	Macau	3	1	0	1	A	A	0	0	E	0	3	4	4	4	4	4	2	4	E	E	B	4	3	3	2	3	2	2	2	5	3	3	4	4	3	4	3	3	1	1	5	2	5		A.是	A.從不	E.總是
71	m71	Macau	3	1	0	1	A	A	0	0	E	0	3	3	4	5	4	3	1	3	B	B	C	4	2	3	3	3	3	4	2	4	3	3	4	4	3	4	4	4	1	1	3	1	4		A.是	A.從不	C.有時
31	m31	Macau	3	0	0	1	A	A	1	0	E	0	4	3	5	4	3	1	1	2	C	E	C	5	2	4	3	5	3	5	4	2	2	5	5	5	2	4	2	2	1	1	3	1	3		A.是	A.從不	C.有時
47	m47	Macau	3	1	1	1	A	A	1	1	A	0	1	4	5	5	5	3	1	5	F	E	F	5	4	3	4	4	5	2	1	5	4	4	5	5	4	3	5	5	1	1	2	2	3		A.是	A.從不	B.偶爾
51	m51	Macau	3	0	0	1	A	A	0	0	E	1	4	2	5	4	4	2	1	5	E	E	E	4	3	3	3	4	3	3	4	2	3	4	4	5	5	4	5	5	1	1	4	2	3		A.是	A.從不	D.經常
45	m45	Macau	3	1	0	1	C	A	0	0	E	0	2	3	4	4	3	3	3	4	D	E	E	3	2	3	3	3	4	5	5	3	3	3	4	4	4	4	3	3	1	1	2	3	4		A.是	A.從不	B.偶爾
76	m76	Macau	3	0	0	1	A	A	0	0	E	1	5	2	4	4	4	4	1	3	E	H	F	4	4	4	2	3	3	4	4	4	4	4	4	4	4	4	4	4	1	3	4	1	3		A.是	C.有時	D.經常
91	m91	Macau	3	0	0	1	A	A	0	0	E	0	1	3	3	3	3	3	3	3	E	F	E	3	3	3	3	3	3	3	3	3	3	3	3	3	3	3	3	3	1	2	2	3	2		A.是	B.偶爾	B.偶爾
99	m99	Macau	3	1	0	1	A	A	0	0	E	0	3	3	3	3	4	4	1	2	H	H	F	4	3	4	3	3	3	3	3	5	4	3	3	3	3	4	4	4	1	4	3	1	4		A.是	D.經常	C.有時
117	m117	Macau	3	1	0	0	A	A	1	0	E	0	1	2	5	5	4	2	1	4	B	B	D	5	2	4	3	3	2	3	5	5	3	5	5	5	5	5	4	4	1	1	2	1	5		A.是	A.從不	B.偶爾
1	g101	Singapore	1	1	1	1	Taoism	Business	1	1	Singapore	1	4	5	5	5	5	5	1	3	Tap water, but only if it is boiled	Tap water, but only if it is boiled	Tap water, but only if it is boiled	4	5	2	1	5	4	4	5	4	5	5	5	5	5	5	5	5	0
2	g104	Singapore	1	1	1	1	Christianity	Business	1	1	Singapore	0	1	5	5	4	5	5	2	2	Not sure	Not sure	Not sure	4	5	2	2	4	4	2	2	4	4	3	4	3	5	3	4	3	0
3	g105	Singapore	1	1	1	1	Buddhism	Business	1	1	Singapore	0	2	4	5	4	4	3	2	3	Tap water, but only if it is boiled	Tap water, but only if it is boiled	Tap water, but only if it is boiled	2	4	3	4	4	2	4	4	4	4	4	4	4	3	2	3	3	1	2	2	1	5
4	g106	Singapore	1	1	1	1	No religion	Engineering	1	1	Singapore	0	1	5	5	3	2	4	1	5	Tap water, but only if it is boiled	Tap water, but only if it is boiled	Tap water, but only if it is boiled	1	3	3	2	4	2	5	4	5	5	5	3	4	5	2	4	4	0
5	g107	Singapore	1	0	1	1	No religion	Engineering	1	1	Singapore	0	1	4	5	5	4	5	1	2	Tap water	Tap water	Tap water	2	3	4	5	5	3	3	1	5	5	4	5	5	4	2	4	3	0
6	g108	Singapore	1	1	0	1	Hinduism	Science	0	0	Bangladesh	0	2	5	5	4	4	4	1	3	Tap water, but only if it is filtered and boiled	Tap water	Tap water, but only if it is filtered and boiled	1	4	4	4	3	4	4	5	4	5	4	4	4	5	2	4	4	1	5	2	3	3
7	g109	Singapore	1	0	0	1	No religion	Business	1	1	China	0	1	5	5	5	3	2	4	4	Tap water	Tap water, but only if it is filtered	Tap water, but only if it is filtered	2	4	3	4	4	4	3	2	5	4	5	5	4	3	3	5	5	1	5	1	2	4
8	g110	Singapore	1	0	0	0	No religion	Science	0	0	China	0	3	4	2	4	3	3	1	2	Tap water	Tap water	Tap water	2	2	2	4	3	3	2	2	4	4	3	3	3	4	4	4	2	1	5	2	1	2
9	g111	Singapore	1	0	1	1	Buddhism	Business	1	1	Singapore	1	5	4	5	5	2	3	3	3	Others	Not sure	Tap water, but only if it is boiled	2	3	3	4	3	4	4	4	2	4	3	4	3	4	2	4	3	0
10	g112	Singapore	1	1	1	1	Christianity	Business	1	1	Singapore	0	1	3	5	4	4	5	2	3	Tap water, but only if it is filtered and boiled	Not sure	Tap water, but only if it is filtered and boiled	2	4	3	4	3	3	2	3	4	4	4	4	4	4	2	4	3	0
11	g114	Singapore	1	0	1	1	No religion	Engineering	1	1	Singapore	0	1	5	5	5	5	1	1	1	Not sure	Not sure	Not sure	2	4	2	1	4	4	2	2	3	3	3	4	4	2	4	4	3	0
12	g115	Singapore	1	0	1	1	No religion	Science	1	1	Singapore	0	1	5	5	5	4	1	1	3	Tap water, but only if it is filtered	Tap water, but only if it is boiled	Tap water, but only if it is boiled	1	1	5	3	4	4	3	1	3	4	4	5	5	5	5	3	4	1	5	1	1	5
13	g117	Singapore	1	1	1	1	No religion	Business	1	1	Singapore	0	1	4	4	3	3	3	1	3	Tap water, but only if it is filtered	Bottled water	Tap water, but only if it is boiled	3	4	4	4	4	4	2	2	5	4	4	4	4	4	3	3	3	0
14	g118	Singapore	1	1	1	1	No religion	FASS	1	1	Singapore	0	1	4	5	4	4	4	1	4	Tap water, but only if it is filtered	Not sure	Tap water, but only if it is filtered	1	4	3	4	4	4	3	2	5	4	5	4	4	5	4	4	4	0
15	g119	Singapore	1	0	0	1	No religion	Business	1	1	China	0	1	3	4	4	3	4	1	4	Tap water, but only if it is filtered	Tap water, but only if it is filtered	Tap water, but only if it is boiled	4	5	2	4	5	3	4	4	2	2	4	4	4	4	2	4	4	1	1	2	1	3
16	g122	Singapore	1	0	1	1	Islam	Engineering	1	1	Singapore	0	5	4	5	5	5	4	5	5	Tap water, but only if it is filtered	Bottled water	Tap water, but only if it is filtered	4	3	3	2	4	5	2	1	5	3	4	4	4	5	2	5	3	0
17	g123	Singapore	1	1	0	1	Christianity	FASS	1	1	Philippines	0	2	3	5	4	4	4	3	3	Tap water, but only if it is filtered	Tap water, but only if it is filtered	Tap water, but only if it is filtered	3	4	3	2	4	4	4	3	2	5	5	4	4	5	4	5	5	0
18	g124	Singapore	1	1	1	1	No religion	Business	1	1	Singapore	0	2	5	5	3	3	3	1	2	Tap water, but only if it is boiled	Not sure	Tap water, but only if it is boiled	2	4	3	2	4	4	4	4	4	4	4	4	4	4	3	3	3	1	1	2	1	5
19	g125	Singapore	1	0	1	1	Christianity	Science	1	1	Singapore	0	1	4	5	5	2	1	1	4	Tap water, but only if it is boiled	Not sure	Tap water, but only if it is boiled	2	3	3	5	4	2	3	3	5	4	5	5	5	2	4	5	5	0
20	g126	Singapore	1	1	1	1	No religion	Science	1	1	Singapore	1	5	5	5	4	4	3	3	4	Bottled water	Bottled water	Bottled water	2	2	3	2	4	3	3	2	3	4	3	2	2	4	4	4	3	0
21	g127	Singapore	1	0	1	1	No religion	Business	1	1	Singapore	0	1	4	5	4	3	5	1	4	Tap water, but only if it is filtered	Not sure	Tap water, but only if it is filtered	5	5	3	2	5	2	1	1	3	4	5	5	4	5	3	4	4	0
22	g130	Singapore	1	1	1	1	Buddhism	Science	1	1	Singapore	0	3	3	4	5	3	1	1	5	Not sure	Not sure	Tap water, but only if it is filtered	1	3	3	3	4	4	2	4	4	5	5	5	5	5	4	4	4	1	2	2	2	4
23	g131	Singapore	1	1	1	1	Islam	Science	1	1	Singapore	0	2	4	4	5	4	1	5	3	Tap water, but only if it is filtered	Not sure	Bottled water, with bottles recycled	3	4	4	2	4	4	3	4	4	4	4	5	5	5	5	5	4	0
24	g132	Singapore	1	0	1	0	No religion	Science	1	1	Singapore	0	3	3	4	4	3	2	1	3	Tap water	Not sure	Tap water, but only if it is boiled	4	3	4	4	3	3	2	2	4	4	4	4	4	4	2	4	3	0
25	g133	Singapore	1	1	0	1	No religion	SoC	1	1	China	0	1	4	4	3	4	1	1	3	Not sure	Not sure	Tap water, but only if it is filtered and boiled	3	3	2	2	4	3	4	1	4	4	2	3	3	1	2	1	1	0
26	g134	Singapore	1	0	1	1	No religion	Engineering	1	1	Singapore	0	3	5	5	5	4	4	1	3	Tap water, but only if it is filtered and boiled	Bottled water	Tap water, but only if it is filtered and boiled	3	4	3	4	4	4	4	4	5	4	4	4	5	5	4	5	5	1	2	2	2	2
27	g136	Singapore	1	1	1	1	Christianity	Business	1	0	Singapore	0	2	4	3	4	4	4	2	4	Tap water, but only if it is boiled	Tap water, but only if it is filtered and boiled	Tap water, but only if it is boiled	3	4	3	2	3	3	2	2	4	4	4	5	5	4	4	4	4	1	5	2	5	4
28	g138	Singapore	1	0	0	1	Buddhism	Business	1	1	Malaysia	0	1	3	5	3	5	1	1	3	Tap water, but only if it is boiled	Not sure	Tap water, but only if it is boiled	2	3	3	1	5	5	5	4	2	3	3	5	4	2	2	2	3	0
29	g139	Singapore	1	1	1	1	No religion	Business	1	1	Singapore	1	5	4	5	5	3	3	1	3	Bottled water	Bottled water	Tap water, but only if it is boiled	5	3	4	5	5	4	1	3	3	5	5	5	5	5	2	5	5	1	1	4	1	5
30	g140	Singapore	1	1	0	1	No religion	SoC	1	1	China	0	1	4	4	5	3	4	1	1	Tap water, but only if it is filtered	Tap water, but only if it is filtered	Tap water, but only if it is filtered	2	2	3	4	3	2	2	1	4	4	3	3	4	2	5	4	4	1	1	2	5	4
31	g201	Singapore	1	1	0	1	No religion	Science	1	0	China	0	4	2	5	5	5	4	1	4	Tap water, but only if it is filtered	Tap water	Tap water, but only if it is filtered and boiled	2	4	2	2	2	4	4	2	4	4	2	4	4	4	2	4	4	1	4	3	2	5
32	g202	Singapore	1	1	1	1	No religion	Science	1	1	Singapore	0	1	3	5	5	4	4	1	4	Tap water, but only if it is filtered and boiled	Not sure	Not sure	2	4	3	2	3	4	2	3	4	4	4	4	4	4	3	4	4	0	1
33	g204	Singapore	1	0	1	1	No religion	Engineering	1	1	Singapore	0	3	5	5	5	5	5	5	5	Tap water	Tap water, but only if it is boiled	Tap water	5	5	5	5	5	5	5	5	5	5	5	5	5	5	5	5	5	0
34	g205	Singapore	1	1	1	1	No religion	Business	1	1	Singapore	0	1	5	5	5	5	4	1	3	Tap water, but only if it is filtered and boiled	Tap water, but only if it is filtered and boiled	Tap water, but only if it is filtered and boiled	3	3	4	2	4	3	2	1	1	4	4	4	4	4	4	4	4	0
35	g206	Singapore	1	1	1	1	No religion	Science	1	1	Singapore	0	3	3	3	4	3	4	1	4	Tap water, but only if it is boiled	Not sure	Tap water, but only if it is boiled	2	4	4	5	3	4	5	4	4	5	4	5	4	5	3	4	4	1	2	2	4	4
36	g207	Singapore	1	1	1	1	Christianity	Business	1	1	Singapore	1	2	5	5	5	5	4	2	2	Tap water, but only if it is boiled	Not sure	Tap water, but only if it is boiled	2	4	3	2	4	4	4	4	2	4	4	2	4	2	2	4	4	0
37	g208	Singapore	1	0	1	1	Buddhism	Engineering	1	1	Singapore	0	1	4	4	3	3	2	1	2	Tap water, but only if it is filtered	Not sure	Tap water, but only if it is filtered and boiled	2	2	3	2	4	4	1	1	2	4	4	4	4	2	4	4	3	0
38	g209	Singapore	1	0	1	1	No religion	Science	1	1	Singapore	0	1	5	5	3	4	4	1	4	Not sure	Not sure	Tap water, but only if it is boiled	2	3	3	4	3	4	4	2	4	5	4	4	4	4	5	4	4	1	2	1	1	5
39	g211	Singapore	1	0	1	1	Christianity	FASS	1	1	Singapore	0	2	5	5	5	5	5	1	5	Bottled water, with bottles recycled	Tap water	Tap water, but only if it is filtered	1	2	2	2	4	2	4	4	5	4	5	5	5	5	4	3	4	0
40	g212	Singapore	1	0	1	1	Christianity	SoC	1	1	Singapore	0	1	4	5	4	3	2	1	3	Tap water	Not sure	Tap water, but only if it is boiled	2	3	3	1	4	4	2	2	4	4	4	5	3	2	2	3	2	1	3	3	3	3
41	g213	Singapore	1	1	1	1	Buddhism	Business	1	1	Singapore	0	3	4	5	3	1	1	2	4	Tap water, but only if it is filtered	Not sure	Tap water, but only if it is filtered	2	3	3	4	3	3	4	4	4	4	5	5	5	5	3	4	3	0
42	g214	Singapore	1	0	0	1	Buddhism	Business	1	1	Malaysia	0	3	4	4	4	5	4	3	5	Bottled water	Bottled water	Bottled water, with bottles recycled	4	5	4	2	4	5	2	4	3	5	5	4	5	5	5	5	5	0
43	g215	Singapore	1	1	1	1	Buddhism	FASS	1	1	Singapore	0	1	4	5	5	5	2	1	4	Tap water, but only if it is boiled	Tap water, but only if it is boiled	Tap water, but only if it is boiled	1	3	4	4	2	2	1	1	4	5	4	5	2	4	4	5	4	0
44	g216	Singapore	1	0	0	1	Buddhism	SoC	0	0	Vietnam	0	3	5	4	3	3	4	1	2	Tap water, but only if it is boiled	Not sure	Tap water, but only if it is boiled	5	5	2	2	5	4	1	1	5	5	5	5	5	5	5	5	4	1	1	2	1	5
45	g219	Singapore	1	1	1	1	Buddhism	Science	1	1	Singapore	0	2	4	4	4	4	4	1	4	Tap water, but only if it is boiled	Not sure	Tap water, but only if it is boiled	3	4	3	4	3	4	2	2	3	4	5	5	5	5	4	3	4	0
46	g220	Singapore	1	1	0	1	Christianity	Science	0	0	Indonesia	1	5	5	5	5	4	4	3	3	Bottled water	Not sure	Bottled water	2	4	3	4	5	5	5	4	4	5	3	3	4	4	5	4	3	1	2	4	1	4
47	g222	Singapore	1	0	1	1	No religion	SoC	1	1	Singapore	0	2	4	4	4	4	4	1	3	Tap water, but only if it is filtered	Tap water, but only if it is filtered	Tap water, but only if it is filtered	3	3	3	4	4	4	2	2	4	4	3	4	4	2	2	2	2	0
48	g223	Singapore	1	0	0	1	Christianity	SoC	1	1	Indonesia	0	2	4	5	4	2	1	1	1	Tap water, but only if it is filtered	Not sure	Tap water, but only if it is filtered and boiled	2	5	2	5	4	5	4	4	5	5	4	4	4	1	4	2	1	1	1	2	1	5
49	g224	Singapore	1	1	1	1	Buddhism	Business	1	1	Singapore	0	2	2	5	5	3	4	1	4	Tap water, but only if it is filtered and boiled	Tap water, but only if it is filtered and boiled	Tap water, but only if it is filtered and boiled	5	5	4	4	5	4	3	2	4	4	4	4	4	5	2	4	4	1	1	1	2	4
50	g225	Singapore	1	1	0	1	Buddhism	Business	1	1	Malaysia	0	5	4	5	4	4	4	2	3	Bottled water, with bottles recycled	Tap water, but only if it is filtered	Tap water, but only if it is filtered and boiled	3	4	3	2	3	3	3	4	3	5	3	4	5	5	4	5	4	0
51	g226	Singapore	1	1	1	1	No religion	Business	1	1	Singapore	0	1	3	5	4	4	3	1	2	Tap water, but only if it is filtered and boiled	Not sure	Tap water, but only if it is filtered and boiled	1	1	4	2	4	4	1	1	4	5	5	5	5	2	3	2	4	0
52	g227	Singapore	1	1	0	1	Sikh	Business	1	1	India	0	2	3	5	4	3	3	2	5	Bottled water, with bottles recycled	Tap water, but only if it is boiled	Tap water	2	2	4	4	3	4	2	3	4	4	5	4	4	4	5	4	5	0	1	1	1	1
53	g228	Singapore	1	1	1	1	Christianity	Business	1	1	Singapore	0	1	4	5	4	2	5	1	4	Tap water, but only if it is filtered and boiled	Tap water, but only if it is filtered	Tap water, but only if it is boiled	3	3	3	4	4	4	3	2	4	4	4	4	4	4	5	4	3	0
54	g229	Singapore	1	0	1	1	No religion	Engineering	1	1	Singapore	0	2	4	5	5	4	3	1	5	Tap water, but only if it is filtered	Tap water	Tap water, but only if it is boiled	4	3	4	4	4	4	2	1	4	4	5	4	4	3	2	3	4	0
55	g230	Singapore	1	1	1	1	Buddhism	Business	1	1	Singapore	0	1	5	5	3	5	4	1	3	Tap water, but only if it is boiled	Tap water, but only if it is boiled	Tap water, but only if it is boiled	2	4	3	1	2	4	5	3	5	5	5	5	5	5	4	2	5	0
56	g232	Singapore	1	1	1	1	Buddhism	FASS	1	1	Singapore	1	2	5	5	5	4	2	1	4	Tap water	Tap water, but only if it is filtered	Tap water, but only if it is filtered	3	3	4	4	5	4	5	5	5	5	4	3	3	4	3	2	1	0
57	g236	Singapore	1	0	1	1	Hinduism	Engineering	1	1	Singapore	0	2	3	4	5	4	3	1	3	Tap water	Tap water	Tap water	1	3	4	2	2	3	2	4	4	4	4	4	4	5	4	3	4	0
58	g239	Singapore	1	1	1	1	No religion	Business	1	1	Singapore	1	1	4	5	4	4	4	1	3	Bottled water, with bottles recycled	Bottled water, with bottles recycled	Tap water, but only if it is filtered and boiled	2	4	3	4	4	3	2	2	4	4	3	4	4	4	4	4	4	0
59	g241	Singapore	1	0	1	1	Christianity	Science	1	1	Singapore	0	4	5	5	5	3	5	1	5	Tap water, but only if it is filtered	Tap water, but only if it is filtered	Bottled water	1	2	5	5	4	4	5	1	5	5	5	5	5	5	5	5	5	0
60	g242	Singapore	1	1	1	1	Buddhism	Science	1	1	Singapore	0	2	2	5	4	5	4	2	3	Tap water, but only if it is boiled	Not sure	Tap water, but only if it is boiled	2	3	4	5	4	4	4	1	4	4	3	2	3	4	3	3	2	0
61	g302	Singapore	1	1	1	1	Christianity	Science	1	1	Singapore	1	5	4	5	4	5	3	1	3	Tap water	Bottled water	Tap water	2	4	3	4	4	4	4	4	3	4	3	4	4	5	3	4	4	0
62	g303	Singapore	1	0	1	1	Christianity	Business	1	1	Singapore	0	2	4	5	5	4	5	2	3	Tap water, but only if it is filtered and boiled	Tap water, but only if it is filtered and boiled	Tap water, but only if it is filtered and boiled	2	2	3	4	4	3	2	3	4	4	4	4	4	4	4	4	5	0
63	g304	Singapore	1	1	1	1	No religion	Science	1	1	Singapore	0	2	4	5	4	4	3	1	5	Tap water, but only if it is filtered and boiled	Tap water, but only if it is filtered and boiled	Tap water, but only if it is filtered and boiled	3	4	4	4	4	4	4	2	4	4	4	4	4	5	4	3	4	0
64	g305	Singapore	1	1	1	1	Catholicism	Business	1	1	Singapore	1	3	5	5	5	5	3	4	4	Bottled water	Not sure	Not sure	2	2	2	3	4	3	3	3	3	4	3	3	3	3	3	3	2	0
65	g306	Singapore	1	1	1	1	Buddhism	Science	1	1	Singapore	0	3	4	4	4	4	3	3	4	Tap water, but only if it is boiled	Not sure	Not sure	4	4	2	2	4	4	3	3	3	3	4	4	4	4	5	4	4	0
66	g307	Singapore	1	0	0	1	No religion	Engineering	1	1	Vietnam	1	3	3	5	5	4	1	1	3	Bottled water	Not sure	Not sure	5	5	3	2	5	1	1	1	5	5	5	5	5	5	5	5	5	1	1	4	5	2
67	g310	Singapore	1	0	1	1	Buddhism	Business	1	1	Singapore	0	2	4	5	5	4	2	1	4	Tap water, but only if it is boiled	Not sure	Not sure	2	4	3	5	3	3	4	2	5	5	4	4	4	2	1	3	2	1	2	2	4	4
68	g311	Singapore	1	1	1	1	No religion	Science	1	1	Singapore	0	1	3	4	4	3	4	1	3	Tap water, but only if it is boiled	Tap water, but only if it is boiled	Tap water, but only if it is boiled	2	2	3	3	4	4	4	3	4	3	5	5	5	4	3	4	3	0
69	g312	Singapore	1	0	1	1	Christianity	Engineering	1	1	Singapore	1	1	5	5	5	5	4	3	4	Tap water, but only if it is boiled	Tap water, but only if it is filtered	Tap water, but only if it is filtered	4	5	5	1	4	4	1	1	5	5	5	5	5	4	1	4	3	1	1	2	3	3
70	g313	Singapore	1	1	1	0	Buddhism	FASS	1	1	Singapore	0	1	4	5	4	5	5	1	5	Tap water, but only if it is boiled	Tap water, but only if it is filtered and boiled	Tap water, but only if it is boiled	4	1	5	4	2	2	1	1	5	5	5	5	5	5	1	5	5	0
71	g314	Singapore	1	1	1	1	No religion	Business	1	1	Singapore	1	1	4	5	4	5	3	2	4	Tap water, but only if it is filtered and boiled	Not sure	Tap water, but only if it is filtered and boiled	4	3	3	2	4	3	3	4	2	4	4	5	3	4	4	4	4	0
72	g315	Singapore	1	1	1	1	Christianity	Science	1	0	Singapore	0	2	4	5	5	4	5	2	4	Bottled water, with bottles recycled	Bottled water	Tap water, but only if it is filtered and boiled	2	5	2	2	4	4	4	2	3	2	4	5	5	5	3	4	2	0
73	g316	Singapore	1	1	0	1	No religion	Science	1	1	China	0	1	4	5	5	5	3	3	4	Tap water, but only if it is filtered and boiled	Not sure	Tap water, but only if it is boiled	2	2	2	4	3	4	4	1	4	4	4	4	3	4	4	3	4	1	3	2	3	4
74	g317	Singapore	1	1	0	1	Buddhism	Business	1	1	Malaysia	0	2	3	4	4	2	4	1	2	Tap water, but only if it is filtered and boiled	Not sure	Tap water, but only if it is boiled	4	5	2	3	3	4	2	2	4	4	4	4	5	4	2	4	3	1	1	2	3	3
75	g318	Singapore	1	1	1	1	No religion	Science	1	1	Singapore	0	1	5	5	5	5	5	1	5	Tap water	Tap water, but only if it is filtered and boiled	Tap water	2	3	3	5	3	1	1	1	5	5	4	4	4	4	4	4	4	0
76	g319	Singapore	1	1	1	1	Islam	Business	1	1	Singapore	0	3	5	4	5	4	1	1	1	Tap water, but only if it is boiled	Not sure	Not sure	1	2	2	5	3	1	1	2	5	4	5	5	4	2	1	2	2	0
77	g320	Singapore	1	0	1	1	No religion	Engineering	1	1	Singapore	0	1	3	5	3	3	2	1	3	Not sure	Not sure	Tap water, but only if it is boiled	4	5	5	3	3	3	4	4	5	5	3	5	3	3	3	1	3	1	5	1	1	5
78	g321	Singapore	1	1	1	1	Buddhism	Science	1	1	Singapore	0	2	5	5	5	5	5	3	5	Tap water, but only if it is boiled	Not sure	Tap water, but only if it is boiled	2	4	3	4	4	4	2	2	1	5	4	4	4	5	4	5	3	0
79	g322	Singapore	1	1	1	1	Buddhism	Science	1	1	Singapore	0	3	4	5	5	3	4	1	4	Tap water, but only if it is boiled	Tap water, but only if it is filtered	Tap water, but only if it is boiled	4	5	5	1	4	5	2	2	3	4	4	5	5	5	2	5	5	1	1	2	1	5
80	g323	Singapore	1	0	1	1	Buddhism	Business	1	1	Singapore	1	2	5	5	5	5	4	1	1	Tap water, but only if it is boiled	Not sure	Tap water, but only if it is boiled	4	5	3	5	5	4	4	1	1	5	3	3	3	3	3	3	1	0	1
81	g324	Singapore	1	0	1	1	No religion	Business	1	1	Singapore	0	1	3	4	4	4	3	2	5	Tap water, but only if it is filtered and boiled	Bottled water	Others	2	3	4	2	5	5	4	4	5	4	5	5	3	4	5	4	4	0
82	g325	Singapore	1	0	1	1	No religion	Science	1	1	Singapore	0	1	5	4	5	2	1	1	4	Tap water	Tap water, but only if it is filtered	Tap water, but only if it is boiled	1	1	3	2	4	2	1	2	5	4	4	4	5	4	2	1	4	1	4	2	1	5
83	g326	Singapore	1	1	1	1	Islam	FASS	1	1	Singapore	0	1	4	5	5	3	1	2	5	Tap water, but only if it is filtered	Tap water, but only if it is filtered	Tap water, but only if it is boiled	2	4	3	2	2	2	1	2	4	4	5	5	5	4	2	4	5	0
84	g327	Singapore	1	1	1	1	No religion	Science	1	1	Singapore	0	1	5	5	5	4	4	1	3	Tap water, but only if it is boiled	Tap water	Tap water, but only if it is boiled	1	2	3	4	2	4	2	1	5	5	4	4	5	2	2	3	4	0
85	g328	Singapore	1	1	1	1	No religion	Business	1	1	Singapore	0	1	4	4	3	3	3	2	3	Tap water, but only if it is boiled	Bottled water	Tap water, but only if it is boiled	4	5	3	3	4	4	4	4	5	4	4	4	4	5	5	4	5	0
86	g329	Singapore	1	1	1	1	Hinduism	Engineering	1	1	Singapore	0	2	5	5	4	4	3	1	4	Tap water, but only if it is filtered and boiled	Bottled water	Tap water, but only if it is filtered	1	2	4	4	4	3	5	4	4	4	2	4	4	4	4	5	2	0
87	g330	Singapore	1	1	1	1	No religion	FASS	1	1	Singapore	0	2	4	3	4	2	4	1	4	Tap water, but only if it is boiled	Tap water, but only if it is boiled	Tap water, but only if it is boiled	2	3	4	5	3	4	2	2	4	4	4	4	4	5	5	4	2	0
88	g331	Singapore	1	0	0	1	No religion	Engineering	1	1	Indonesia	0	1	4	5	4	4	3	1	5	Tap water, but only if it is filtered	Bottled water	Tap water, but only if it is filtered and boiled	4	4	4	4	4	4	5	3	4	5	4	4	4	4	3	4	4	1	2	1	1	2
89	g333	Singapore	1	0	1	1	Hinduism	Engineering	1	1	Singapore	0	2	4	5	4	4	4	2	2	Tap water	Tap water	Tap water, but only if it is boiled	2	4	2	4	4	4	4	2	4	5	4	4	4	3	3	2	4	1	5	2	2	2
90	g334	Singapore	1	1	1	1	Buddhism	SoC	1	1	Singapore	0	1	4	4	4	5	5	1	2	Tap water, but only if it is filtered and boiled	Not sure	Tap water, but only if it is filtered	5	3	3	1	4	4	1	1	3	3	4	4	4	1	1	1	3	0
91	g335	Singapore	1	0	1	1	Buddhism	SoC	1	1	Singapore	0	1	5	5	5	5	4	1	3	Tap water, but only if it is boiled	Not sure	Tap water, but only if it is boiled	1	3	5	5	3	4	3	1	5	4	5	5	5	5	4	5	5	0
92	g337	Singapore	1	0	0	1	No religion	SoC	1	1	China	0	2	5	5	5	5	5	1	5	Tap water, but only if it is boiled	Bottled water	Tap water, but only if it is boiled	5	5	3	5	5	5	5	4	5	5	4	5	5	5	5	4	4	0	3	2	3	3
93	g338	Singapore	1	1	1	1	No religion	Business	1	1	Singapore	0	1	5	4	5	3	4	1	4	Tap water, but only if it is filtered and boiled	Tap water, but only if it is filtered and boiled	Tap water, but only if it is filtered and boiled	2	5	2	2	5	4	4	5	5	4	4	4	5	5	4	5	2	0
94	g339	Singapore	1	1	1	1	Buddhism	FASS	1	1	Singapore	0	2	4	5	5	5	4	2	4	Tap water, but only if it is filtered	Not sure	Tap water, but only if it is filtered	3	4	3	4	3	3	3	3	5	4	4	4	4	5	3	4	4	0
95	g340	Singapore	1	1	0	1	No religion	Business	1	1	China	0	1	3	5	5	5	5	1	1	Tap water	Tap water	Tap water, but only if it is boiled	3	2	5	2	4	4	2	4	4	4	4	4	4	4	2	2	4	1	5	1	1	4
96	g401	Singapore	1	1	1	1	Christianity	Engineering	1	1	Singapore	0	1	5	5	5	3	3	2	3	Tap water, but only if it is boiled	Tap water, but only if it is filtered	Tap water, but only if it is boiled	2	3	3	2	3	4	2	2	4	4	4	4	4	2	2	3	3	0
97	g402	Singapore	1	1	1	1	No religion	Engineering	1	1	Singapore	0	2	4	4	4	2	3	1	3	Tap water, but only if it is filtered and boiled	Tap water, but only if it is filtered and boiled	Tap water, but only if it is filtered and boiled	5	5	4	5	5	5	2	2	5	5	4	4	4	5	3	3	4	0
98	g403	Singapore	1	1	1	1	No religion	Business	1	1	Singapore	0	3	3	4	4	3	4	1	2	Tap water, but only if it is filtered and boiled	Not sure	Tap water, but only if it is filtered and boiled	2	4	3	2	3	4	3	4	4	4	4	4	4	4	5	3	2	0
99	g404	Singapore	1	1	0	1	Christianity	Engineering	1	0	China	0	1	4	4	5	5	4	1	4	Tap water, but only if it is filtered and boiled	Bottled water, with bottles recycled	Tap water, but only if it is filtered and boiled	4	4	3	2	4	5	3	2	4	5	5	5	5	5	5	5	5	0
100	g405	Singapore	1	1	0	1	Christianity	SoC	1	0	Indonesia	0	3	4	5	5	5	4	1	1	Bottled water	Tap water, but only if it is filtered and boiled	Bottled water	4	5	2	3	4	4	5	3	4	3	5	5	3	2	3	4	2	0
101	g407	Singapore	1	1	1	1	No religion	Engineering	1	1	Singapore	0	1	5	4	5	4	5	1	5	Tap water, but only if it is boiled	Not sure	Tap water, but only if it is boiled	2	3	3	4	3	3	4	1	5	5	5	5	5	4	5	4	4	1	1	2	4	5
102	g408	Singapore	1	1	1	1	Buddhism	Science	1	1	Singapore	0	1	5	5	4	4	4	2	4	Tap water, but only if it is filtered and boiled	Tap water, but only if it is filtered and boiled	Tap water, but only if it is filtered and boiled	2	4	2	2	4	4	2	2	4	4	5	5	5	5	3	4	4	1	1	1	1	5
103	g409	Singapore	1	1	0	1	Buddhism	FASS	1	1	Malaysia	0	1	4	5	5	4	3	1	4	Tap water, but only if it is boiled	Not sure	Tap water, but only if it is boiled	2	3	4	4	5	3	1	1	3	4	5	5	5	5	4	5	3	1	1	3	1	5
104	g410	Singapore	1	0	1	1	No religion	Business	1	1	Singapore	0	1	5	5	5	5	5	1	5	Tap water, but only if it is filtered and boiled	Not sure	Tap water, but only if it is filtered and boiled	2	4	3	1	4	5	3	5	5	4	5	5	5	5	5	5	5	1	1	1	1	5
105	g411	Singapore	1	0	1	1	No religion	Science	1	1	Singapore	0	1	5	3	3	1	1	1	1	Tap water, but only if it is boiled	Not sure	Tap water, but only if it is boiled	3	4	3	3	3	4	4	3	4	3	4	4	4	3	3	1	3	0
106	g412	Singapore	1	1	1	1	Christianity	Science	1	1	Singapore	0	4	4	5	5	4	4	1	4	Tap water, but only if it is boiled	Tap water, but only if it is boiled	Tap water, but only if it is boiled	3	4	3	4	3	4	4	4	4	4	4	4	4	5	3	4	4	1	1	4	2	5
107	g413	Singapore	1	1	1	1	No religion	Business	1	1	Singapore	1	5	5	5	5	5	5	1	5	Bottled water	Bottled water	Bottled water	5	5	5	5	5	5	5	5	4	5	5	5	5	5	5	5	3	0
108	g414	Singapore	1	1	0	1	Hinduism	Engineering	1	1	India	0	2	4	4	5	2	4	1	3	Tap water	Tap water, but only if it is filtered	Tap water	1	1	3	3	2	4	2	4	4	5	5	5	4	3	4	2	2	0
109	g415	Singapore	1	1	1	1	Buddhism	SoC	1	1	Singapore	1	3	4	5	5	5	2	2	4	Tap water, but only if it is filtered	Tap water, but only if it is filtered	Tap water, but only if it is filtered	2	4	2	4	4	2	2	4	3	4	4	4	4	2	3	2	2	0
110	g416	Singapore	1	1	0	1	Buddhism	Engineering	0	0	Malaysia	0	1	5	5	5	5	5	2	5	Tap water, but only if it is filtered	Not sure	Tap water, but only if it is filtered and boiled	3	3	3	2	4	2	2	1	4	4	5	5	5	5	2	3	5	1	1	1	2	5
111	g417	Singapore	1	1	0	1	Buddhism	Science	1	1	Malaysia	0	1	5	5	5	5	5	1	4	Tap water, but only if it is boiled	Not sure	Tap water, but only if it is boiled	4	3	3	2	3	2	1	1	5	4	4	4	2	5	4	4	4	1	1	2	4	5
112	g419	Singapore	1	0	1	1	No religion	Business	1	1	Singapore	0	2	5	5	5	3	1	1	3	Tap water, but only if it is boiled	Not sure	Tap water, but only if it is boiled	2	3	5	3	5	5	2	2	5	5	5	5	5	5	3	5	3	0
113	g420	Singapore	1	1	0	1	No religion	Business	1	1	Vietnam	0	1	4	5	4	5	3	1	4	Tap water, but only if it is filtered and boiled	Not sure	Bottled water	2	4	4	3	4	4	3	4	4	4	4	4	4	4	3	4	4	0
114	g421	Singapore	1	1	0	1	Buddhism	Business	1	1	Malaysia	0	2	2	4	3	4	4	2	3	Tap water, but only if it is filtered and boiled	Bottled water	Tap water, but only if it is filtered and boiled	4	4	3	2	5	5	4	3	3	4	4	4	4	4	4	4	4	0
115	g422	Singapore	1	1	1	1	No religion	Science	1	1	Singapore	0	1	4	5	4	4	4	1	4	Tap water, but only if it is filtered	Tap water, but only if it is filtered	Tap water, but only if it is filtered	1	3	2	2	4	2	3	2	5	4	4	4	4	5	3	4	4	1	2	1	1	4
116	g426	Singapore	1	0	1	1	Buddhism	SoC	1	1	Singapore	0	4	3	4	5	4	5	1	3	Tap water, but only if it is boiled	Tap water	Tap water, but only if it is boiled	2	4	3	3	5	4	4	4	4	5	4	4	4	4	5	3	2	0
117	g429	Singapore	1	0	1	1	No religion	Business	1	1	Singapore	0	1	4	3	4	2	2	1	4	Tap water	Tap water, but only if it is filtered and boiled	Tap water, but only if it is boiled	3	4	3	5	5	3	2	2	4	4	4	4	3	4	4	3	4	1	4	3	3	3
118	g430	Singapore	1	0	1	1	No religion	Engineering	1	1	Singapore	0	1	5	5	5	3	2	1	3	Tap water, but only if it is filtered	Tap water, but only if it is filtered and boiled	Tap water, but only if it is boiled	1	5	2	3	4	4	2	2	5	5	4	5	4	4	2	3	3	1	2	1	2	5
119	g432	Singapore	1	1	1	1	Buddhism	Science	1	1	Singapore	0	3	5	5	5	5	3	3	4	Tap water, but only if it is filtered	Bottled water	Tap water, but only if it is filtered	1	1	4	3	4	2	1	1	4	4	4	4	5	4	4	4	4	0
120	g433	Singapore	1	1	0	1	No religion	SoC	0	0	China	0	1	3	5	4	4	4	3	3	Tap water, but only if it is filtered and boiled	Tap water, but only if it is filtered	Tap water, but only if it is filtered and boiled	5	4	2	2	4	3	3	2	5	4	4	5	5	3	2	4	3	1	5	2	3	4
121	g434	Singapore	1	0	1	1	No religion	Science	1	1	Singapore	0	4	4	5	5	5	3	1	5	Tap water	Not sure	Tap water, but only if it is boiled	1	1	4	2	4	4	2	4	2	5	5	5	4	4	2	3	3	0
122	g435	Singapore	1	0	1	1	No religion	Engineering	1	1	Singapore	1	5	5	5	5	5	1	1	3	Tap water, but only if it is boiled	Not sure	Tap water, but only if it is boiled	2	3	4	4	4	4	3	2	5	5	2	5	5	5	3	1	3	0
123	g437	Singapore	1	1	1	1	No religion	FASS	1	1	Singapore	0	1	4	3	3	3	2	2	3	Tap water	Tap water, but only if it is filtered	Tap water, but only if it is filtered and boiled	2	3	3	4	4	4	3	2	4	4	4	4	4	4	4	4	4	1	3	2	1	4
124	g440	Singapore	1	0	1	1	Christianity	Science	1	1	Singapore	0	1	4	5	4	4	4	4	5	Tap water, but only if it is filtered and boiled	Not sure	Tap water, but only if it is filtered and boiled	2	3	3	3	3	3	2	2	3	4	4	4	4	4	3	3	4	0
125	g501	Singapore	1	0	1	1	Christianity	Business	1	1	Singapore	1	1	3	5	4	3	4	2	3	Bottled water, with bottles recycled	Not sure	Others	1	3	2	2	4	3	2	2	4	4	3	4	4	3	3	3	3	0
126	g502	Singapore	1	0	1	1	No religion	Business	1	1	Singapore	0	3	5	4	5	3	5	2	4	Bottled water	Bottled water	Tap water, but only if it is boiled	2	4	2	2	4	4	2	3	4	5	4	4	4	5	2	4	3	0
127	g503	Singapore	1	1	1	1	Christianity	Science	1	1	Singapore	0	5	5	4	4	2	3	5	4	Tap water	Not sure	Tap water	2	4	4	4	3	5	5	4	5	4	4	5	4	4	5	5	5	1	4	3	1	3
128	g504	Singapore	1	1	1	1	No religion	Business	1	1	Singapore	1	5	4	5	3	5	2	1	4	Bottled water	Bottled water	Tap water, but only if it is boiled	2	4	4	2	2	2	3	2	1	2	3	4	3	5	4	4	4	0
129	g506	Singapore	1	1	1	1	Christianity	Science	1	1	Singapore	0	3	4	4	5	5	5	1	4	Tap water, but only if it is boiled	Not sure	Tap water, but only if it is boiled	3	4	2	2	4	3	4	4	4	4	5	5	5	5	5	5	3	0
130	g508	Singapore	1	1	0	1	No religion	Business	1	1	China	1	5	5	5	5	4	3	1	5	Bottled water, with bottles recycled	Not sure	Bottled water	2	4	2	4	2	2	2	3	4	4	4	4	4	5	4	4	2	0
131	g509	Singapore	1	1	1	1	Christianity	FASS	1	1	Singapore	0	1	5	5	5	5	5	5	5	Tap water, but only if it is filtered and boiled	Not sure	Tap water, but only if it is boiled	1	3	3	2	3	4	4	2	4	4	5	3	5	5	3	5	5	0
132	g511	Singapore	1	1	1	1	No religion	Science	1	1	Singapore	0	1	3	4	5	3	5	1	3	Tap water, but only if it is boiled	Not sure	Tap water, but only if it is boiled	2	4	3	4	4	4	4	3	4	4	3	4	4	5	3	3	3	0
133	g513	Singapore	1	0	1	1	Christianity	FASS	1	1	Singapore	0	1	5	5	5	5	1	1	5	Tap water, but only if it is filtered and boiled	Tap water, but only if it is filtered and boiled	Tap water, but only if it is filtered	2	3	3	3	4	4	2	2	4	4	4	4	4	4	4	4	4	0
134	g514	Singapore	1	1	0	1	No religion	Science	1	1	Philippines	0	1	4	5	5	3	3	1	3	Not sure	Not sure	Tap water	2	3	3	4	4	3	2	2	5	4	4	4	4	2	2	3	3	0
135	g515	Singapore	1	0	1	1	Buddhism	Business	1	1	Singapore	0	3	4	5	4	4	4	2	4	Bottled water, with bottles recycled	Bottled water, with bottles recycled	Bottled water, with bottles recycled	4	4	4	4	4	4	4	4	4	4	4	4	5	5	4	4	4	1	2	3	2	2
136	g516	Singapore	1	0	0	1	Hinduism	SoC	0	0	India	0	2	4	5	5	5	5	1	4	Tap water, but only if it is filtered	Tap water, but only if it is filtered	Tap water, but only if it is filtered	2	4	2	4	4	3	2	4	5	5	3	4	4	4	4	4	4	1	3	2	1	5
137	g520	Singapore	1	1	1	1	No religion	Science	1	1	Singapore	0	1	4	5	4	4	5	1	5	Tap water, but only if it is boiled	Not sure	Tap water, but only if it is boiled	2	4	3	2	3	3	1	3	4	4	5	5	5	5	3	4	5	0
138	g522	Singapore	1	0	0	0	Islam	Engineering	0	0	Iran	0	2	4	5	5	5	3	5	5	Tap water, but only if it is filtered	Tap water, but only if it is filtered	Tap water, but only if it is filtered	3	3	3	4	3	3	3	3	4	4	4	4	5	4	3	4	4	1	4	2	2	4
139	g523	Singapore	1	0	1	1	Buddhism	Science	1	1	Singapore	0	1	5	3	4	1	1	1	2	Tap water, but only if it is filtered	Tap water, but only if it is boiled	Tap water, but only if it is filtered	2	3	4	4	2	4	4	4	4	4	3	4	4	2	2	2	4	0
140	g524	Singapore	1	1	1	1	Islam	Science	1	1	Singapore	0	3	3	4	5	4	3	4	4	Bottled water, with bottles recycled	Tap water, but only if it is filtered	Tap water, but only if it is boiled	1	4	1	1	4	5	3	1	4	4	4	5	5	4	1	1	2	1	1	2	4	5
141	g525	Singapore	1	0	1	1	No religion	Business	1	1	Singapore	0	1	5	5	5	3	1	1	5	Tap water, but only if it is boiled	Not sure	Tap water, but only if it is boiled	2	2	3	4	2	3	2	3	4	4	4	4	4	4	4	4	4	0
142	g526	Singapore	1	0	1	1	Christianity	Law	1	1	Singapore	0	1	5	5	5	5	4	2	4	Tap water, but only if it is filtered	Tap water, but only if it is filtered	Tap water, but only if it is filtered and boiled	5	5	5	5	4	4	4	4	4	4	4	5	4	4	5	4	4	0	2	2	2	3
143	g529	Singapore	1	1	1	1	No religion	Business	1	1	Singapore	0	1	4	4	5	3	4	1	4	Not sure	Not sure	Tap water, but only if it is boiled	1	4	2	5	4	4	3	1	3	5	4	5	5	5	5	5	5	1	3	3	1	1
144	g530	Singapore	1	0	0	1	No religion	SoC	1	1	Malaysia	0	1	4	5	4	4	4	3	3	Tap water, but only if it is filtered	Not sure	Tap water, but only if it is filtered	3	3	4	4	4	4	4	4	4	4	4	4	4	3	4	3	3	1	1	2	2	2
145	g531	Singapore	1	0	1	1	No religion	Business	1	1	Singapore	0	1	5	5	5	4	1	1	3	Bottled water, with bottles recycled	Not sure	Not sure	1	3	3	2	4	4	1	2	5	5	4	5	5	5	5	5	5	1	5	1	1	3
146	g533	Singapore	1	0	1	1	Buddhism	SoC	1	1	Singapore	0	4	4	5	5	5	4	1	3	Tap water	Not sure	Tap water	2	4	4	4	4	3	4	3	4	4	4	4	4	4	4	4	3	0
147	g534	Singapore	1	0	1	1	Buddhism	Engineering	1	1	Singapore	0	2	5	5	5	3	4	1	4	Tap water, but only if it is filtered	Bottled water	Tap water, but only if it is boiled	1	4	2	3	1	3	3	1	4	4	3	3	3	4	2	3	4	0
148	g535	Singapore	1	0	1	1	No religion	SoC	1	1	Singapore	0	5	5	5	5	4	3	1	3	Not sure	Tap water, but only if it is boiled	Tap water, but only if it is filtered and boiled	4	4	5	4	4	4	5	4	3	4	4	4	4	5	3	4	4	0
149	g536	Singapore	1	1	1	1	No religion	Business	1	1	Singapore	0	1	2	5	2	4	4	1	5	Tap water, but only if it is boiled	Not sure	Tap water, but only if it is boiled	3	4	3	2	3	2	3	3	2	4	5	5	5	5	3	5	5	0
150	g537	Singapore	1	1	0	1	Buddhism	Business	1	1	China	1	5	3	5	4	5	3	3	4	Bottled water	Bottled water	Bottled water	4	4	3	2	4	4	4	4	4	4	3	4	4	4	3	4	4	1	3	3	3	1
151	g538	Singapore	1	1	1	1	Buddhism	Business	1	1	Singapore	0	1	4	5	4	4	3	1	4	Tap water, but only if it is filtered	Not sure	Tap water, but only if it is boiled	4	5	3	3	4	4	4	2	4	3	5	5	4	4	2	2	3	0
152	g539	Singapore	1	1	0	1	No religion	Business	1	1	China	1	5	4	5	4	5	4	1	2	Bottled water	Tap water, but only if it is boiled	Tap water, but only if it is boiled	2	5	2	2	4	3	3	3	4	2	3	2	3	2	4	2	2	1	2	3	3	3
153	g540	Singapore	1	0	1	1	Buddhism	Science	1	1	Singapore	0	2	5	5	5	4	4	1	4	Tap water, but only if it is filtered and boiled	Tap water, but only if it is filtered and boiled	Tap water, but only if it is boiled	2	4	4	3	3	4	4	2	1	4	5	5	5	5	5	5	4	1	1	2	1	5
154	g541	Singapore	1	1	0	1	Christianity	Science	1	1	China	0	1	5	5	4	4	3	3	4	Tap water, but only if it is filtered and boiled	Tap water, but only if it is filtered and boiled	Tap water, but only if it is filtered and boiled	2	4	3	4	4	4	3	4	4	4	4	4	4	4	4	4	5	0	2	2	3	2
155	g542	Singapore	1	0	1	1	Buddhism	Science	1	1	Singapore	0	1	5	5	5	5	1	1	3	Not sure	Not sure	Not sure	1	1	1	5	1	1	5	1	5	5	5	4	3	1	5	5	1	1	4	2	3	5
156	g543	Singapore	1	1	1	1	No religion	Business	1	1	Singapore	0	3	4	2	5	1	1	1	2	Bottled water	Not sure	Tap water, but only if it is boiled	2	3	3	4	4	3	2	4	3	4	4	4	4	5	4	4	4	1	2	3	1	3
157	g602	Singapore	1	1	1	1	Christianity	Science	1	1	Singapore	1	3	4	5	4	4	2	2	4	Bottled water	Not sure	Tap water, but only if it is filtered	3	4	4	4	4	2	4	4	3	4	4	5	4	5	5	5	5	0
158	g603	Singapore	1	0	0	0	No religion	Engineering	1	0	China	0	2	1	5	3	2	5	4	4	Tap water	Tap water	Tap water	3	5	2	5	5	5	4	4	5	4	3	4	4	2	3	5	5	0
159	g604	Singapore	1	1	1	1	No religion	Science	1	1	Singapore	0	3	4	5	5	3	3	1	3	Bottled water	Tap water, but only if it is filtered	Tap water, but only if it is boiled	2	4	3	1	4	4	4	5	4	4	3	4	4	4	2	2	3	1	2	4	2	5
160	g605	Singapore	1	1	1	1	Buddhism	Business	1	1	Singapore	0	1	4	5	5	4	1	1	2	Not sure	Bottled water, with bottles recycled	Tap water, but only if it is boiled	4	4	4	3	4	4	1	1	4	4	4	4	4	1	2	2	3	0
161	g606	Singapore	1	0	1	1	Christianity	FASS	1	1	Singapore	0	4	4	4	4	5	4	3	4	Tap water, but only if it is filtered and boiled	Tap water, but only if it is filtered and boiled	Tap water, but only if it is filtered and boiled	3	4	3	2	4	3	2	2	4	4	4	4	4	3	4	4	4	0
162	g607	Singapore	1	1	1	1	Christianity	Business	1	1	Singapore	0	1	5	5	5	5	5	3	3	Tap water, but only if it is boiled	Not sure	Tap water, but only if it is boiled	4	4	3	4	4	4	2	1	5	4	4	4	4	3	3	3	4	1	1	4	5	4
163	g608	Singapore	1	1	1	1	No religion	Engineering	1	1	Singapore	0	2	4	5	5	2	3	1	5	Tap water, but only if it is boiled	Tap water, but only if it is filtered and boiled	Tap water, but only if it is boiled	2	3	3	2	4	3	2	2	4	4	5	4	4	5	5	3	3	0
164	g609	Singapore	1	0	1	1	No religion	Science	1	1	Singapore	0	4	5	3	5	3	1	1	4	Tap water, but only if it is filtered and boiled	Not sure	Not sure	4	4	4	4	5	3	3	5	4	4	3	4	5	5	4	4	3	0	4	3	1	4
165	g611	Singapore	1	0	1	1	Christianity	Business	1	1	Singapore	0	1	5	4	5	4	3	1	4	Tap water, but only if it is boiled	Tap water, but only if it is boiled	Tap water, but only if it is boiled	2	2	3	3	3	2	1	1	4	4	5	5	5	5	3	1	5	0
166	g613	Singapore	1	0	0	1	Christianity	Engineering	1	1	Philippines	0	1	4	5	4	3	1	1	4	Tap water, but only if it is filtered	Not sure	Tap water, but only if it is filtered	2	3	3	5	4	3	2	2	4	4	4	4	4	5	2	4	3	0
167	g616	Singapore	1	0	0	1	No religion	Engineering	1	1	Vietnam	0	1	5	5	5	4	2	1	1	Tap water, but only if it is filtered and boiled	Tap water, but only if it is filtered and boiled	Tap water, but only if it is filtered and boiled	3	4	4	5	3	4	2	4	4	4	3	4	4	3	3	1	1	1	4	2	1	4
168	g617	Singapore	1	0	0	1	Christianity	Science	0	0	Malaysia	0	1	5	4	5	3	4	1	1	Tap water, but only if it is filtered and boiled	Not sure	Tap water, but only if it is boiled	2	1	3	3	4	3	1	1	5	5	4	4	4	3	3	2	3	1	3	3	3	3
169	g620	Singapore	1	0	1	1	No religion	FASS	1	1	Singapore	1	1	4	5	5	3	1	1	4	Tap water, but only if it is filtered and boiled	Bottled water	Tap water, but only if it is filtered and boiled	2	2	2	4	5	5	5	5	3	3	5	5	5	5	3	3	3	0
170	g621	Singapore	1	1	0	0	No religion	Engineering	1	0	China	0	3	4	5	5	4	3	1	3	Tap water, but only if it is filtered and boiled	Bottled water	Tap water, but only if it is filtered and boiled	3	4	3	4	3	4	5	5	5	4	4	4	4	3	4	5	3	0
171	g622	Singapore	1	1	0	1	No religion	Business	1	1	China	0	2	4	5	4	3	4	2	3	Tap water, but only if it is filtered	Tap water, but only if it is filtered	Tap water, but only if it is filtered and boiled	3	3	3	2	3	4	3	2	3	3	4	4	4	4	4	4	4	1	4	3	1	3
172	g623	Singapore	1	0	1	1	Buddhism	Business	1	1	Singapore	0	1	4	5	4	3	5	1	3	Tap water, but only if it is filtered and boiled	Not sure	Tap water, but only if it is filtered and boiled	2	2	4	4	3	3	2	2	4	5	4	4	4	5	4	5	4	0
173	g625	Singapore	1	1	0	1	Hinduism	Business	1	1	India	1	5	1	5	5	1	1	1	2	Bottled water	Bottled water	Bottled water	3	5	2	4	2	2	2	2	2	5	2	3	4	3	3	3	3	1	3	5	3	5
174	g626	Singapore	1	0	1	1	No religion	Business	1	1	Singapore	0	2	4	5	5	5	4	1	3	Tap water, but only if it is filtered	Not sure	Tap water, but only if it is filtered	3	4	3	2	4	4	2	2	3	4	3	4	4	4	2	4	3	0
175	g627	Singapore	1	1	1	1	Buddhism	Business	1	1	Singapore	0	2	3	4	4	5	3	2	4	Tap water, but only if it is filtered and boiled	Not sure	Tap water, but only if it is filtered and boiled	2	5	3	2	4	3	3	4	5	4	2	3	4	4	4	4	3	0
176	g628	Singapore	1	0	1	1	Buddhism	SoC	1	1	Singapore	0	1	4	4	4	3	3	2	2	Tap water, but only if it is filtered	Not sure	Tap water, but only if it is boiled	3	4	4	4	4	2	2	5	5	5	2	4	4	2	2	4	2	0
177	g629	Singapore	1	0	0	0	No religion	Engineering	1	0	Iran	0	3	3	4	4	4	3	2	4	Tap water, but only if it is filtered and boiled	Tap water, but only if it is filtered and boiled	Tap water, but only if it is filtered and boiled	3	4	3	4	4	4	4	3	4	4	4	4	4	4	2	4	4	1	5	2	2	3
178	g630	Singapore	1	1	1	1	No religion	Business	1	1	Singapore	0	1	4	4	4	3	4	1	4	Tap water, but only if it is filtered	Tap water, but only if it is boiled	Tap water, but only if it is filtered	2	3	4	5	3	2	1	1	4	4	5	4	4	5	3	4	4	0
179	g633	Singapore	1	0	0	0	Hinduism	Engineering	1	0	India	0	5	5	5	5	5	5	5	5	Bottled water	Bottled water	Bottled water	3	3	3	3	3	3	3	3	3	3	3	3	3	3	3	3	3	1	5	5	5	5
180	g634	Singapore	1	0	1	1	No religion	Business	1	1	Singapore	0	1	4	5	5	3	3	1	4	Tap water, but only if it is filtered and boiled	Tap water, but only if it is filtered and boiled	Tap water, but only if it is filtered and boiled	3	4	3	3	4	4	4	4	5	5	4	4	5	5	3	4	4	0
181	g635	Singapore	1	1	1	1	No religion	Business	1	1	Singapore	0	5	4	5	4	5	4	1	4	Tap water, but only if it is filtered	Bottled water	Tap water, but only if it is filtered	3	3	3	3	3	3	3	3	3	3	3	3	3	3	3	3	3	0
182	g637	Singapore	1	1	1	1	Buddhism	Science	1	1	Singapore	0	4	4	4	4	4	3	3	5	Tap water, but only if it is boiled	Not sure	Tap water, but only if it is boiled	3	3	3	3	3	3	4	4	4	3	5	5	5	5	4	3	5	0
183	g640	Singapore	1	0	1	1	No religion	Engineering	1	1	Singapore	0	1	5	5	5	4	5	1	4	Tap water, but only if it is filtered and boiled	Not sure	Tap water, but only if it is filtered and boiled	2	4	5	5	4	4	2	2	5	5	3	5	5	4	4	4	4	0
184	g641	Singapore	1	1	1	1	Buddhism	Business	1	1	Singapore	0	2	4	4	4	5	4	3	4	Tap water, but only if it is filtered	Bottled water	Tap water, but only if it is filtered	4	3	4	2	4	4	3	2	4	3	4	4	4	4	5	4	4	0
185	g643	Singapore	1	1	1	1	No religion	Engineering	1	1	Singapore	0	2	4	4	5	3	4	1	2	Others	Bottled water, with bottles recycled	Others	2	4	5	3	3	3	4	2	4	4	2	3	3	2	2	3	2	0
186	g646	Singapore	1	0	0	1	No religion	SoC	1	1	China	0	2	3	4	5	4	3	1	3	Tap water, but only if it is filtered and boiled	Not sure	Tap water, but only if it is filtered and boiled	2	4	2	3	4	2	3	4	5	4	4	4	4	3	5	4	3	0
[truncated: 15 more columns]
